# Supplementary material for: Polystyrene-immobilized DABCO as a highly efficient and recyclable organocatalyst for the Knoevenagel condensation reaction
Source: Royal Society of Chemistry journal article supplement (doi:10.1039/c3ra43921f), 2013-01-01

## SUPPORTING INFORMATION

### **Polystyrene-immobilized DABCO as a highly efficient and recyclable organocatalyst for Knoevenagel condensation**

Da-Zhen Xu,<sup>a,b</sup> Sen Shi<sup>a</sup> and Yongmei Wang<sup>a,\*</sup>

<sup>a</sup> Department of Chemistry, State Key Laboratory and Institute of Elemento-Organic Chemistry, Nankai University, Tianjin, 300071, People's Republic of China  
Fax: +86 22 2350 2654; e-mail: ymw@nankai.edu.cn

<sup>b</sup> National Pesticide Engineering Research Center (Tianjin), Nankai University, Tianjin, 300071, People's Republic of China

### **Contents**

|                                                                           |   |
|---------------------------------------------------------------------------|---|
| <b>Spectroscopic Data for Compounds 6</b> .....                           | 2 |
| <b>References</b> .....                                                   | 6 |
| <b>Spectra of compounds (<sup>1</sup>H NMR, <sup>13</sup>C NMR)</b> ..... | 7 |

### Spectroscopic Data for Compounds 6

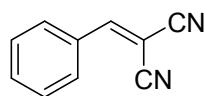

#### 2-(Phenylmethylene)malononitrile (6a)<sup>1</sup>

White solid (153 mg, yield > 99%), mp. 83-84°C. <sup>1</sup>H NMR (400MHz, CDCl<sub>3</sub>) δ: 7.57 (t, J = 8.0Hz, 2H), 7.67 (t, J = 7.2Hz, 2H), 7.82 (s, 1H), 7.94 (d, J = 7.6Hz, 2H). <sup>13</sup>C NMR (100MHz, CDCl<sub>3</sub>) δ: 83.34, 112.38, 113.48, 129.29, 130.10, 131.88, 141.18, 158.35.

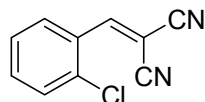

#### 2-(2-chlorobenzylidene)malononitrile (6b)<sup>1</sup>

White solid (187 mg, yield 99%), m.p. 94°C. <sup>1</sup>H NMR (400MHz, CDCl<sub>3</sub>) δ: 7.43-7.48 (m, 1H), 7.53-7.59 (m, 2H), 8.18 (d, J = 8.0Hz, 1H), 8.28 (s, 1H). <sup>13</sup>C NMR (100MHz, CDCl<sub>3</sub>) δ: 85.78, 111.94, 113.25, 127.82, 129.06, 129.52, 130.73, 135.08, 136.36, 156.10.

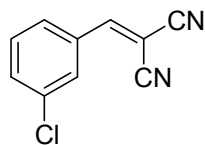

#### 2-(3-chlorobenzylidene)malononitrile (6c)<sup>2</sup>

White solid (187 mg, yield 99%), m.p. 113-115°C. <sup>1</sup>H NMR (400MHz, CDCl<sub>3</sub>) δ: 7.50 (t, J = 8.4Hz, 1H), 7.59-7.61 (m, 1H), 7.74(s, 1H), 7.83-7.85 (m, 2H). <sup>13</sup>C NMR (100MHz, CDCl<sub>3</sub>) δ: 84.69, 112.06, 113.23, 128.37, 130.46, 130.92, 132.32, 134.39, 135.82, 158.25.

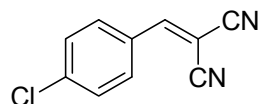

#### 2-(4-chlorobenzylidene)malononitrile (6d)<sup>1</sup>

White solid (187 mg, yield 99%), m.p. 164-165°C. <sup>1</sup>H NMR (400MHz, CDCl<sub>3</sub>) δ: 7.52 (d, J = 8.4, 2H), 7.75 (s, 1H), 7.86 (d, J = 8.8, 2H). <sup>13</sup>C NMR (100MHz, CDCl<sub>3</sub>) δ: 83.34, 112.38, 113.48, 129.29, 130.10, 131.88, 141.18, 158.35.

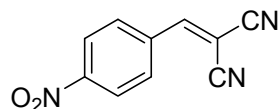

#### 2-(4-nitrobenzylidene)malononitrile (6e)<sup>1</sup>

Yellow solid (197 mg, yield 99%), m.p. 161-162°C. <sup>1</sup>H NMR (400MHz, CDCl<sub>3</sub>) δ: 7.92 (s, 1H), 8.11 (d, J = 8.8Hz, 2H), 8.42 (d, J = 8.4Hz, 2H). <sup>13</sup>C NMR (100MHz, CDCl<sub>3</sub>) δ: 87.54, 111.63, 112.66, 124.67, 131.35, 135.82, 150.37, 156.93.

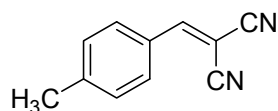

#### 2-(p-tolyl) malononitrile (6f)<sup>3</sup>

White solid (165 mg, yield 98%), m.p. 133-134°C. <sup>1</sup>H NMR (400MHz, CDCl<sub>3</sub>) δ: 2.46 (s, 3H), 7.34 (d, J = 8.4Hz, 2H), 7.73 (s, 1H), 7.81 (d, J = 8.4Hz, 2H). <sup>13</sup>C NMR (100MHz, CDCl<sub>3</sub>) δ: 22.06, 81.18, 112.91, 114.06, 128.48, 130.41, 130.96, 146.44, 159.83.

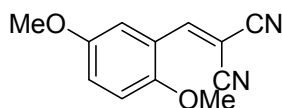

**2-(2,5-dimethoxybenzylidene)malononitrile (6g)<sup>4</sup>**

White solid (212 mg, yield 99%), m.p. 109-110°C. <sup>1</sup>H NMR (400MHz, CDCl<sub>3</sub>) δ: 3.81 (s, 3H), 3.88 (s, 3H), 6.93 (d, J = 9.2Hz, 1H), 7.17 (dd, J<sub>1</sub> = 3.2Hz, J<sub>2</sub> = 9.2Hz, 1H), 7.72 (d, J = 2.8Hz, 1H), 8.28 (s, 1H). <sup>13</sup>C NMR (100MHz, CDCl<sub>3</sub>) δ: 55.88, 56.35, 80.95, 111.17, 112.85, 113.24, 114.38, 120.14, 124.30, 153.47, 153.79, 154.14.

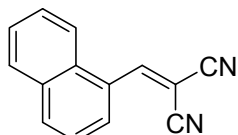

**2-(naphthalen-1-yl)methylene)malononitrile (6h)<sup>5</sup>**

White solid (202 mg, yield 99%), m.p. 164-165°C. <sup>1</sup>H NMR (400MHz, CDCl<sub>3</sub>) δ: 7.62-7.74 (m, 3H), 7.99 (d, J = 8.8Hz, 2H), 8.14 (d, J = 8.4Hz, 1H), 8.30 (d, J = 7.2Hz, 1H), 8.68 (s, 1H). <sup>13</sup>C NMR (100MHz, CDCl<sub>3</sub>) δ: 85.16, 112.54, 113.75, 122.32, 125.41, 127.52, 128.54, 128.60, 129.46, 131.09, 133.55, 134.96, 157.74.

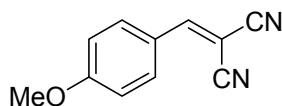

**2-(4-methoxybenzylidene)malononitrile (6i)<sup>6</sup>**

White solid (182 mg, yield 99%), m.p. 110-112°C. <sup>1</sup>H NMR (400MHz, CDCl<sub>3</sub>) δ: 3.95 (s, 3H), 7.04 (d, J = 8.8Hz, 2H), 7.68 (s, 1H), 7.94 (d, J = 8.8Hz, 2H). <sup>13</sup>C NMR (100MHz, CDCl<sub>3</sub>) δ: 55.86, 78.52, 113.41, 114.49, 115.17, 124.04, 133.51, 158.94, 164.87.

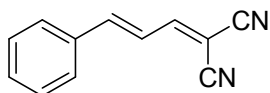

**2-(E)-3-phenylallylidene)malononitrile (6j)<sup>1</sup>**

Yellow solid (179 mg, yield 99%), m.p. 126-127°C. <sup>1</sup>H NMR (400MHz, CDCl<sub>3</sub>) δ: 7.27-73.5 (m, 2H), 7.46-7.52 (m, 3H), 7.62-7.66 (m, 3H). <sup>13</sup>C NMR (100MHz, CDCl<sub>3</sub>) δ: 82.94, 111.74, 113.59, 122.29, 129.01, 129.39, 132.17, 133.96, 150.55, 160.17.

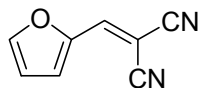

**2-(furan-2-yl)methylene)malononitrile (6k)<sup>7</sup>**

Brown solid (143 mg, yield 99%), m.p. 69-70°C. <sup>1</sup>H NMR (400MHz, CDCl<sub>3</sub>) δ: 6.75 (m, J = 2.0Hz, 1H), 7.38 (d, J = 2.4Hz, 1H), 7.55 (s, 1H), 7.84 (s, 1H). <sup>13</sup>C NMR (100MHz, CDCl<sub>3</sub>) δ: 112.65, 113.86, 114.50, 123.28, 143.12, 148.10, 149.63.

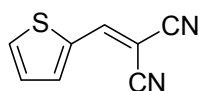

**2-(thiophen-2-yl)methylene)malononitrile (6l)<sup>8</sup>**

Brown solid (159 mg, yield 99%), m.p. 110-112°C. <sup>1</sup>H NMR (400MHz, CDCl<sub>3</sub>) δ: 7.28 (dd, J<sub>1</sub> = 4.0 Hz,

$J_2 = 5.2$  Hz, 1H), 7.82 (d,  $J = 4.0$  Hz, 1H), 7.89 (s, 2H).  $^{13}\text{C}$  NMR (100MHz,  $\text{CDCl}_3$ )  $\delta$ : 78.23, 113.02, 113.86, 129.09, 135.42, 137.04, 138.36, 151.24.

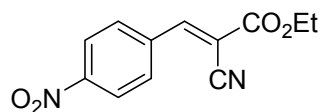

**(E)-ethyl 2-cyano-3-(4-nitrophenyl)acrylate (6n)<sup>9</sup>**

Yellow solid (244 mg, yield 99%), m.p. 172-173 °C.  $^1\text{H}$  NMR (400MHz,  $\text{CDCl}_3$ )  $\delta$ : 1.42 (t,  $J = 6.8$ Hz, 3H), 4.43 (q,  $J_1 = 7.2$ Hz,  $J_2 = 14.4$ Hz, 2H), 8.14 (d,  $J = 8.8$ Hz, 2H), 8.31 (s, 1H), 8.35 (d,  $J = 8.8$ Hz).  $^{13}\text{C}$  NMR (100MHz,  $\text{CDCl}_3$ )  $\delta$ : 14.12, 63.36, 107.37, 114.56, 124.34, 131.54, 136.92, 149.71, 151.76, 161.42.

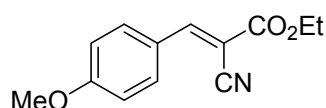

**(E)-ethyl 2-cyano-3-(4-methoxyphenyl)acrylate (6o)<sup>9</sup>**

White solid (224 mg, yield 97%), m.p. 79-80 °C.  $^1\text{H}$  NMR (400MHz,  $\text{CDCl}_3$ )  $\delta$ : 1.39 (t,  $J = 7.2$ Hz, 3H), 3.89 (s, 3H), 4.36 (q,  $J_1 = 7.2$ Hz,  $J_2 = 14.4$ Hz, 2H), 6.99 (d,  $J = 8.8$ Hz, 2H), 8.00 (d,  $J = 8.8$ Hz, 2H), 8.17 (s, 1H).  $^{13}\text{C}$  NMR (100MHz,  $\text{CDCl}_3$ )  $\delta$ : 14.21, 55.64, 62.44, 99.32, 114.77, 116.25, 124.36, 133.65, 154.40, 163.13, 163.78.

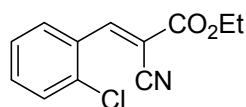

**(E)-ethyl 3-(2-chlorophenyl)-2-cyanoacrylate (6p)<sup>3</sup>**

White solid (233 mg, yield 99%), m.p. 51-52 °C.  $^1\text{H}$  NMR (400MHz,  $\text{CDCl}_3$ )  $\delta$ : 1.41 (t,  $J = 7.2$ Hz, 3H), 4.41 (q,  $J_1 = 7.2$ Hz,  $J_2 = 14.4$ Hz, 2H), 7.40 (t,  $J = 7.2$ Hz, 1H), 7.45-7.51 (m, 2H), 8.23 (d,  $J = 8.0$ Hz, 1H), 8.68 (s, 1H).  $^{13}\text{C}$  NMR (100MHz,  $\text{CDCl}_3$ )  $\delta$ : 14.14, 62.96, 106.16, 114.82, 127.48, 129.85, 130.34, 133.71, 136.42, 151.14, 161.80.

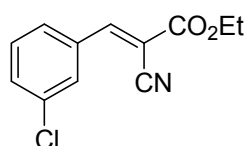

**(E)-ethyl 3-(3-chlorophenyl)-2-cyanoacrylate (6q)<sup>10</sup>**

White solid (233 mg, yield 99%), m.p. 100-101 °C.  $^1\text{H}$  NMR (400MHz,  $\text{CDCl}_3$ )  $\delta$ : 1.40 (t,  $J = 7.2$ Hz, 3H), 4.39 (q,  $J_1 = 6.8$ Hz,  $J_2 = 14.0$ Hz, 2H), 7.45 (t,  $J = 8.0$ Hz, 1H), 7.53 (d,  $J = 8.4$ Hz, 1H), 7.90-7.93 (m, 2H), 8.18 (s, 1H).  $^{13}\text{C}$  NMR (100MHz,  $\text{CDCl}_3$ )  $\delta$ : 14.15, 63.00, 104.67, 114.96, 128.65, 130.56, 130.84, 133.07, 135.36, 153.23, 162.01.

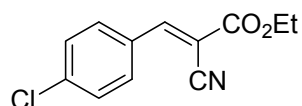

**(E)-ethyl 3-(4-chlorophenyl)-2-cyanoacrylate (6r)<sup>9</sup>**

White solid (233 mg, yield 99%), m.p. 91-92 °C.  $^1\text{H}$  NMR (400MHz,  $\text{CDCl}_3$ )  $\delta$ : 1.40 (t,  $J = 7.2$ Hz, 3H), 4.39 (q,  $J_1 = 7.2$ Hz,  $J_2 = 14.4$ Hz, 2H), 7.48 (d,  $J = 8.4$ Hz, 2H), 7.94 (d,  $J = 8.8$ Hz, 2H), 8.20 (s, 1H).  $^{13}\text{C}$  NMR (100MHz,  $\text{CDCl}_3$ )  $\delta$ : 14.16, 62.90, 103.48, 115.29, 129.69, 129.88, 132.22, 139.61, 153.42, 162.25.

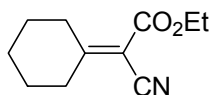

**Ethyl 2-cyano-2-cyclohexylideneacetate (8a)<sup>9</sup>**

Colourless liquid (174 mg, yield 90%). <sup>1</sup>H NMR (400MHz, CDCl<sub>3</sub>) δ: 1.34 (t, J = 7.2Hz, 3H), 1.64-1.82 (m, 6H), 2.66 (t, J = 6.4Hz, 2H), 2.98 (t, J = 6.4Hz, 2H), 4.27 (q, J<sub>1</sub> = 7.2Hz, J<sub>2</sub> = 14Hz, 2H). NMR (100MHz, CDCl<sub>3</sub>) δ: 14.08, 25.64, 28.26, 28.59, 31.57, 36.91, 61.71, 102.01, 115.63, 162.01, 180.07.

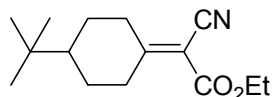

**Ethyl 2-(4-tert-butylcyclohexylidene)-2-cyanoacetate (8b)<sup>11</sup>**

Pale solid (232 mg, yield 93%), m.p. 44-45 °C. <sup>1</sup>H NMR (400MHz, CDCl<sub>3</sub>) δ: 0.92 (s, 9H), 1.34 (t, J = 7.2Hz, 3H), 1.42-1.50 (m, 3H), 2.06-2.10 (m, 3H), 2.29-2.38 (m, 3H), 4.27 (t, J<sub>1</sub> = 7.2Hz, J<sub>2</sub> = 14.4Hz, 2H). <sup>13</sup>C NMR (100MHz, CDCl<sub>3</sub>) δ: 14.09, 27.46, 29.12, 32.46, 36.68, 41.32, 46.69, 61.69, 101.78, 115.63, 162.01, 180.16.

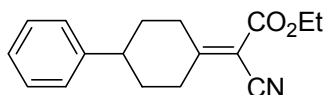

**Ethyl 2-cyano-2-(4-phenylcyclohexylidene)acetate (8c)<sup>12</sup>**

Pale solid (240 mg, yield 89%), m.p. 71-72 °C. <sup>1</sup>H NMR (400MHz, CDCl<sub>3</sub>) δ: 1.35 (t, J = 7.2Hz, 3H), 1.64-1.81 (m, 2H), 2.19-2.25 (m, 3H), 2.46-2.51 (m, 1H), 2.84-2.92 (m, 1H), 3.18-3.22 (m, 1H), 4.29 (q, J<sub>1</sub> = 7.2Hz, J<sub>2</sub> = 14.4Hz, 2H), 7.18-7.23 (m, 3H), 7.30 (t, J = 7.2Hz, 2H). <sup>13</sup>C NMR (100MHz, CDCl<sub>3</sub>) δ: 14.12, 31.13, 34.91, 36.57, 43.39, 61.89, 102.75, 115.55, 126.61, 126.72, 128.62, 144.57, 161.93, 178.30.

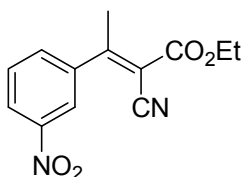

**Ethyl 2-cyano-3-(3-nitrophenyl)but-2-enoate (8d)<sup>13</sup>**

Yellow solid (169 mg, yield 65%), m.p. 94-95 °C. <sup>1</sup>H NMR (400MHz, CDCl<sub>3</sub>) δ: 1.33 (t, J = 7.2Hz, 3H), 2.70 (s, 3H), 4.28 (q, J<sub>1</sub> = 7.2Hz, J<sub>2</sub> = 14.4Hz, 2H), 7.70 (t, J = 7.6Hz, 1H), 8.30 (d, J = 8.0Hz, 1H), 8.43 (d, J = 8.4Hz, 1H), 8.78 (s, 1H). <sup>13</sup>C NMR (100MHz, CDCl<sub>3</sub>) δ: 13.98, 24.77, 26.76, 63.02, 113.11, 123.24, 127.43, 129.95, 133.81, 138.23, 162.95, 195.72.

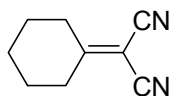

**2-cyclohexylidenemalononitrile (8e)<sup>7</sup>**

Colourless liquid (145 mg, yield 99%). <sup>1</sup>H NMR (400MHz, CDCl<sub>3</sub>) δ: 1.69-1.87 (m, 6H), 2.64-2.66 (m, 4H). <sup>13</sup>C NMR (100MHz, CDCl<sub>3</sub>) δ: 24.99, 27.96, 31.19, 34.75, 82.37, 111.74, 185.31.

## References

- 1 R. Trotzki, M. M. Hoffmann and B. Ondruschka, *Green Chem.* **2008**, *10*, 767–772.
- 2 T.-S. Jin, J.-S. Zhang, A.-Q. Wang, T.-S. Li, *Synth. Commun.* **2004**, *34*, 2611–2616.
- 3 G. Lai, J. Peng, J. Li, H. Qiu, J. Jiang, K. Jiang, Y. Shen, *Tetrahedron Lett.* **2006**, *47*, 6951–6953.
- 4 A. M. Shestopalov, A. P. Yakubov, D. V. Tsyganov, Yu. M. Emel'yanova, V. N. Nesterov, *Chem. Heterocycl. Compd.* (New York, NY, United States), **2002**, *38*, 1180–1189.
- 5 X. Yang, T. Fox, H. Berke, *Org. & Biomol. Chem.* **2012**, *10*, 852–860.
- 6 F. Bigi, M. L. Conforti, R. Maggi, A. Piccinno and G. Sartori, *Green Chem.* **2000**, *2*, 101–103.
- 7 M. Feroci, M. Orsini, L. Palombi and A. Inesi, *Green Chem.* **2007**, *9*, 323–325.
- 8 J. S. Yadav, B. V. S. Reddy, A. K. Basak, B. Visali, A. V. Narsaiah, K. Nagaiah, *Eur. J. Org. Chem.* **2004**, 546–551.
- 9 G. R. Krishnan, K. Sreekumar, *Eur. J. Org. Chem.* **2008**, 4763–4768.
- 10 S.-X. Wang, J.-T. Li, W.-Z. Yang, Y.-H. Yin, Z.-H. Xie, *Synth. Commun.* **2004**, *34*, 829–834.
- 11 A. P. Davis, T. J. Egan, M. G. Orchard, D. Cunningham, P. McArdle, *Tetrahedron*, **1992**, *48*, 8725–8738.
- 12 A. M. Badger, D. A. Schwartz, D. H. Picker, J. W. Dorman, F. C. Bradley, E. N. Cheeseman, M. J. DiMartino, N. Hanna, C. K. Mirabelli. *J. Med. Chem.* **1990**, *33*, 2963–2970.
- 13 P. M. Titchenell, H. D. Hollis Showalter, Y. Jin, J.-F. Pons, A. J. Barber, D. A. Antonetti, *Bioorg. Med. Chem. Lett.* **2013**, *23*, 3034–3038.

### Spectra of compounds (<sup>1</sup>H NMR, <sup>13</sup>C NMR)

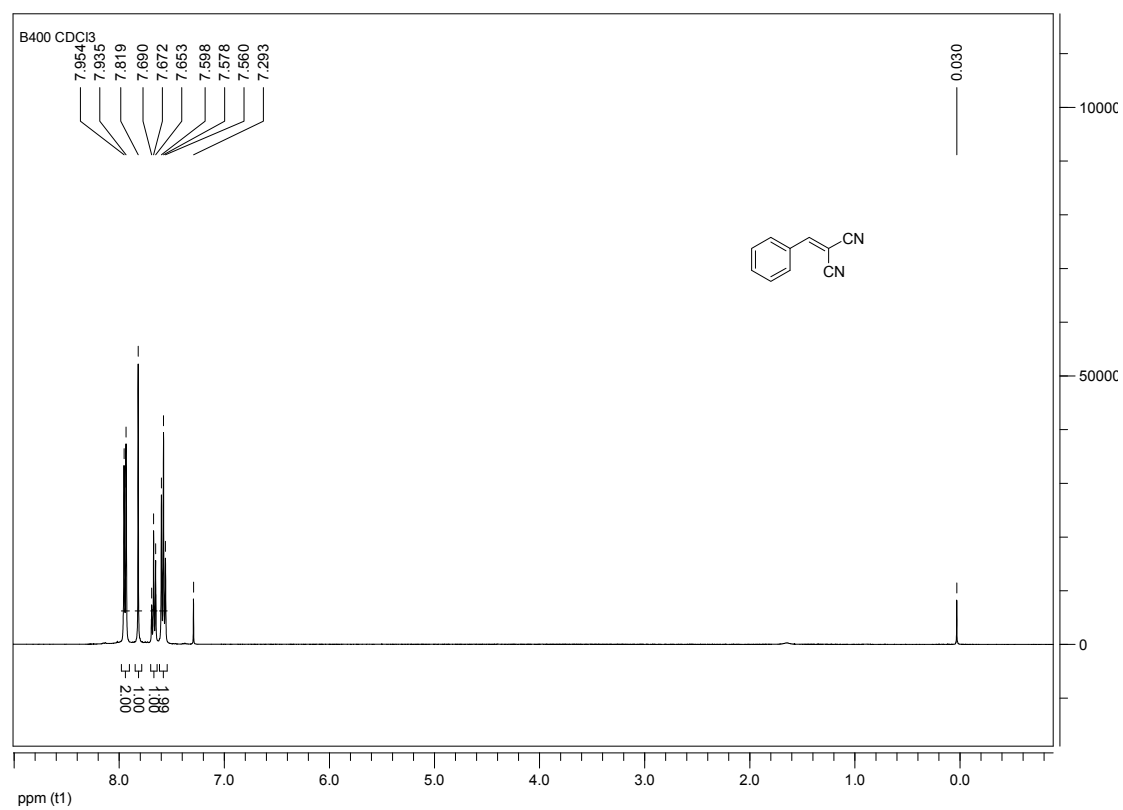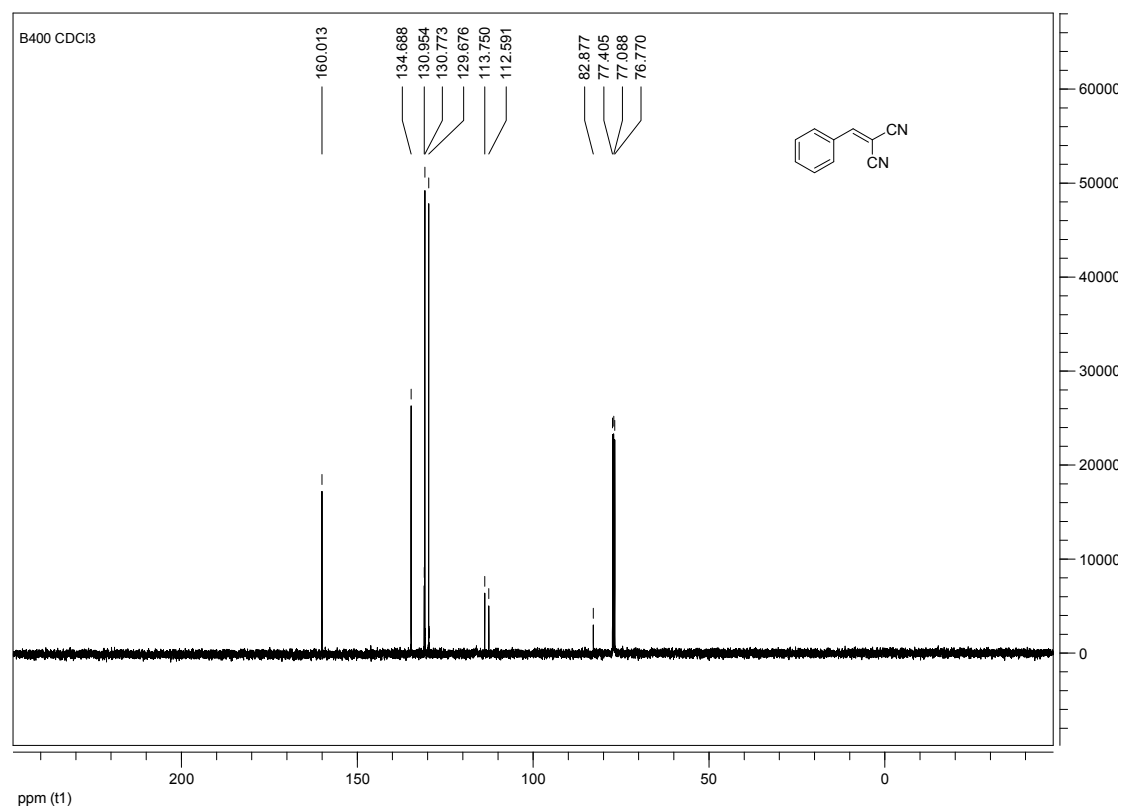

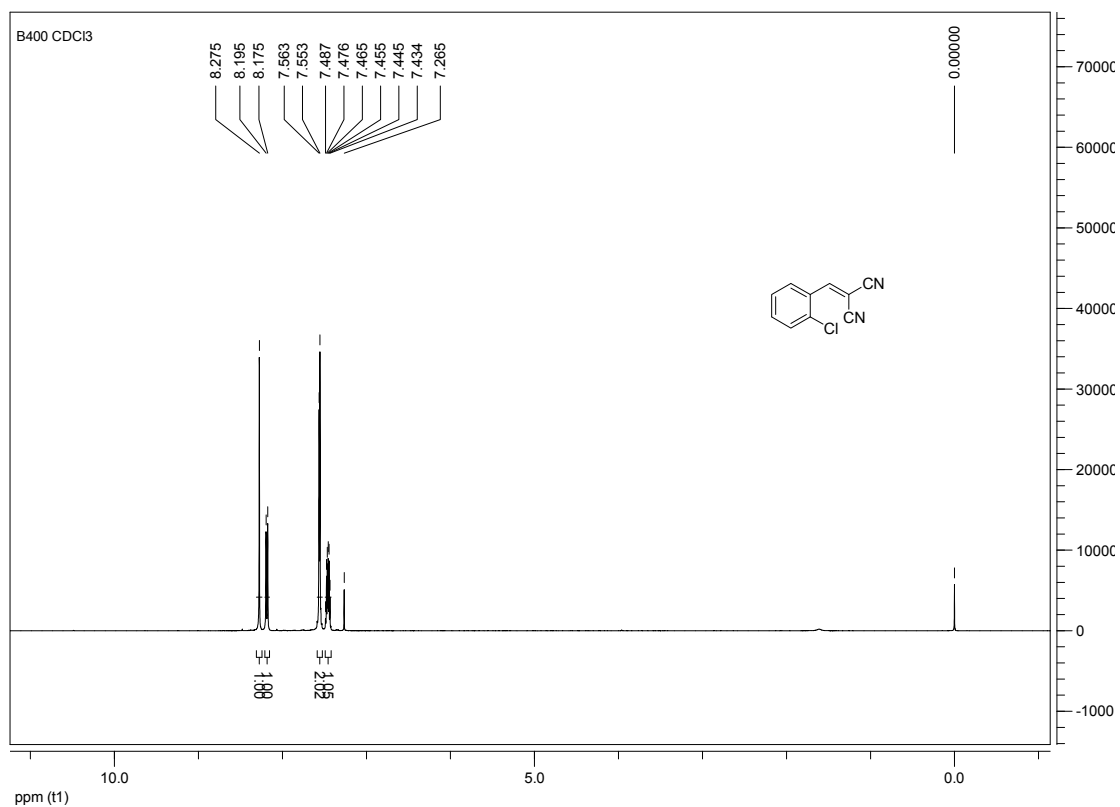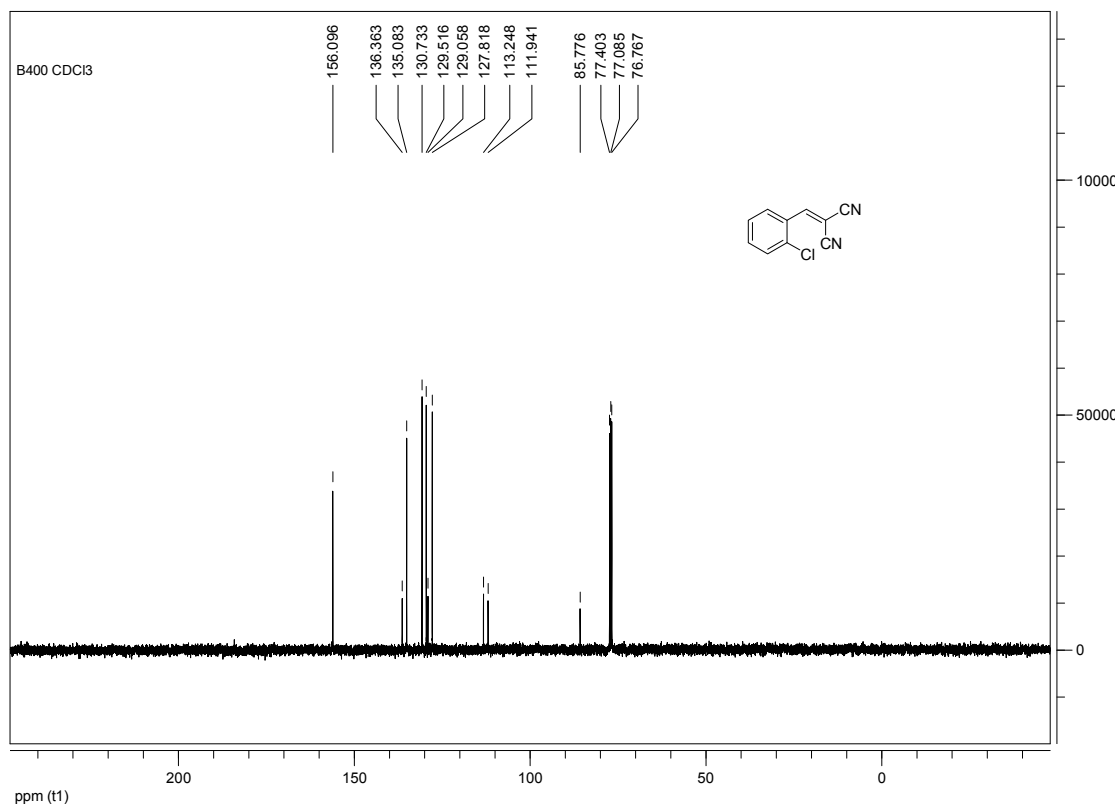



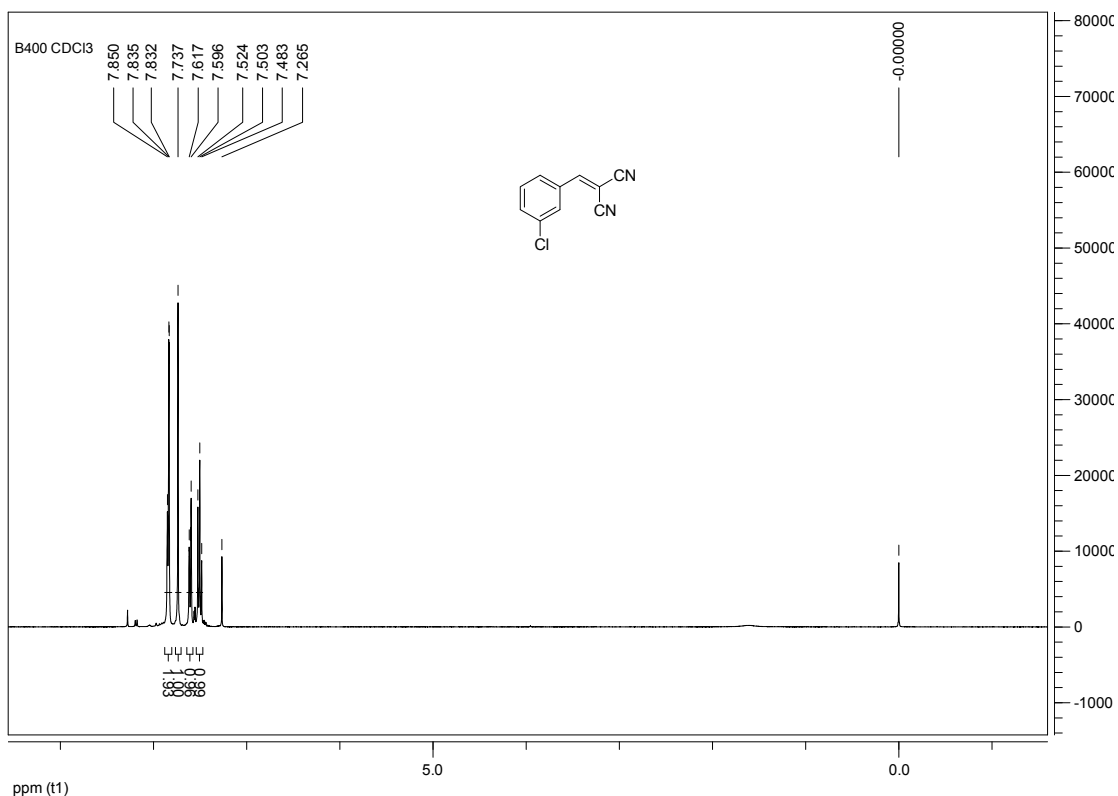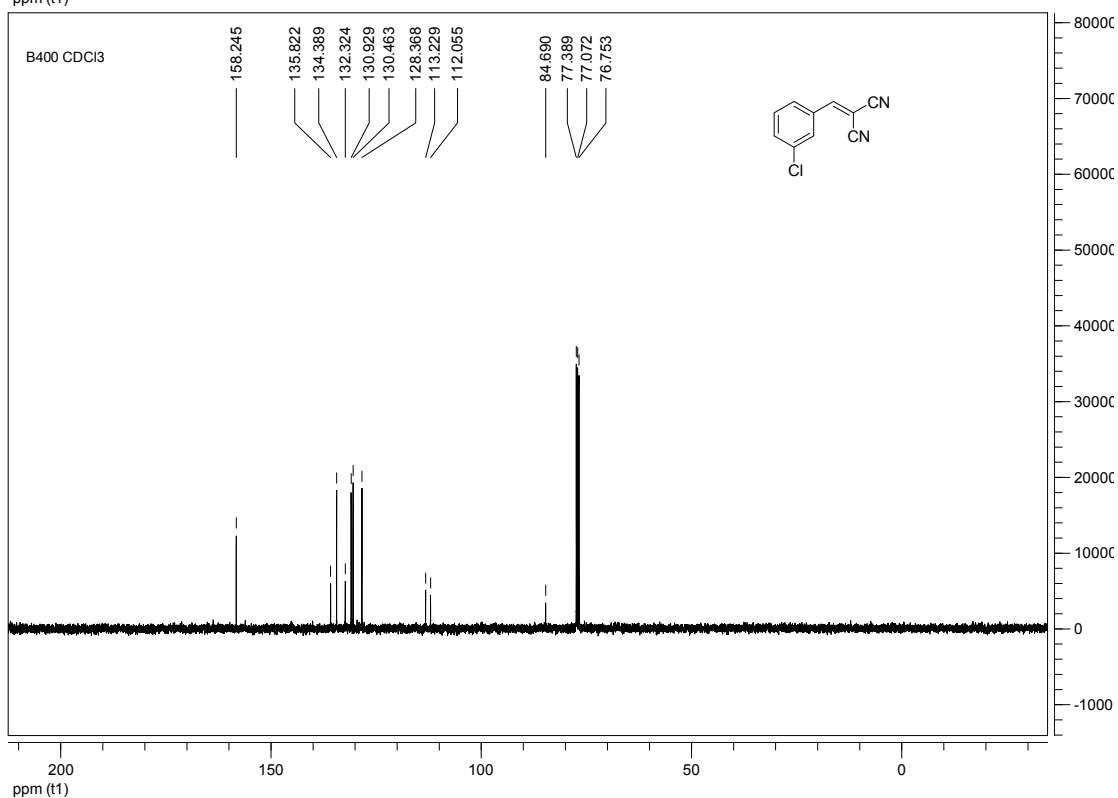

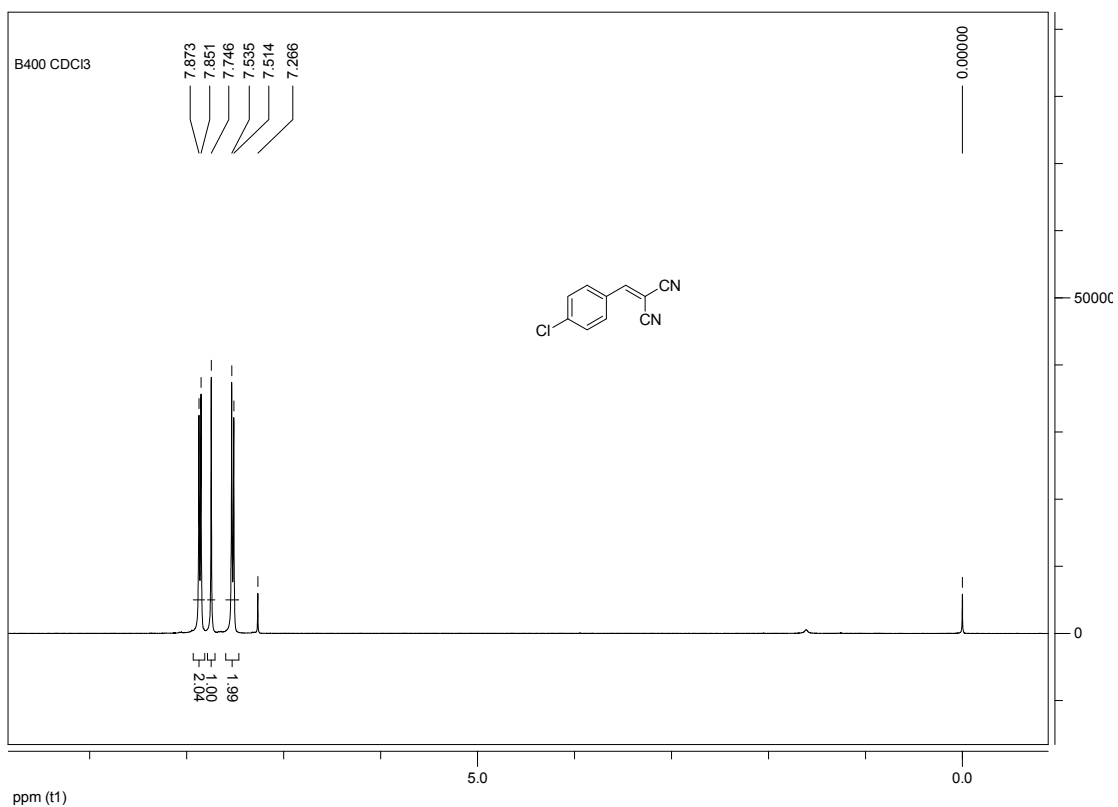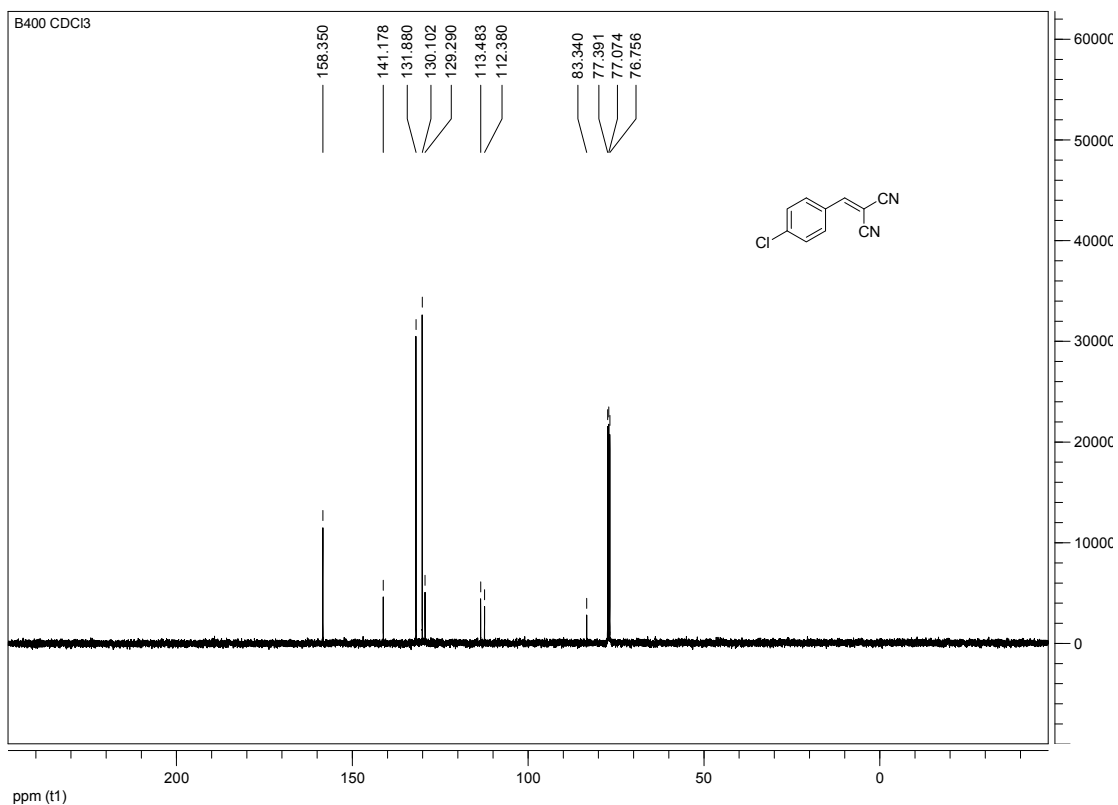

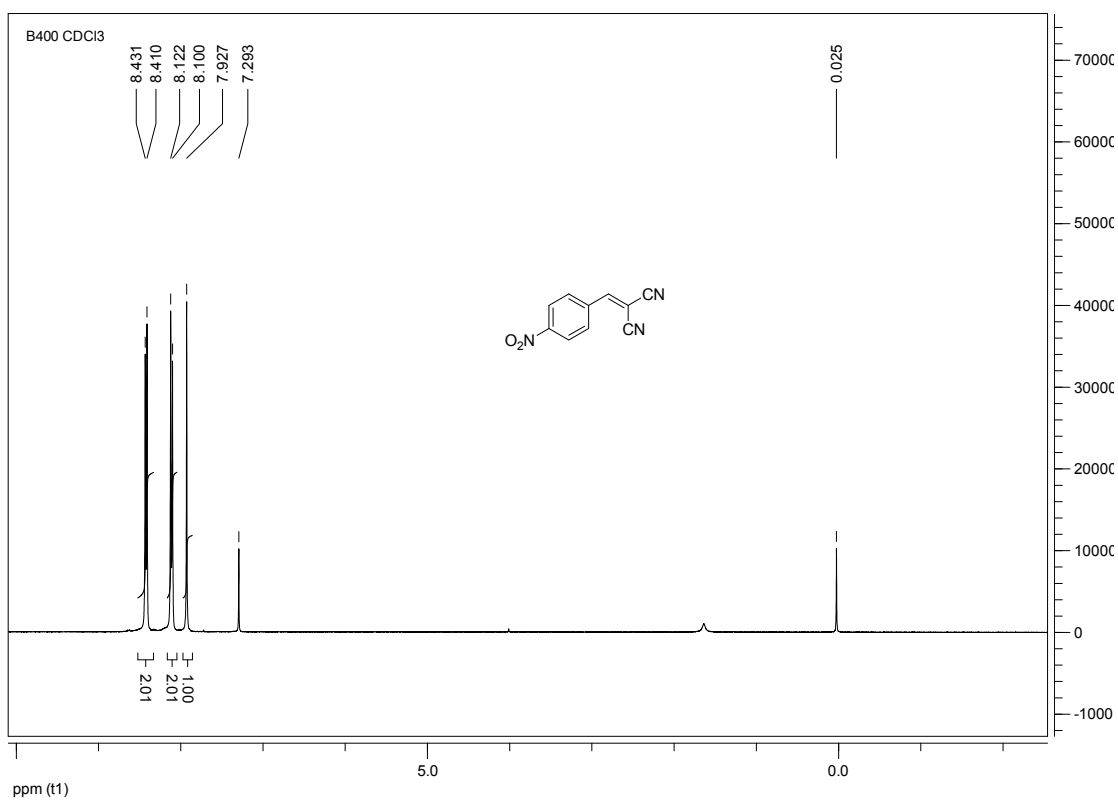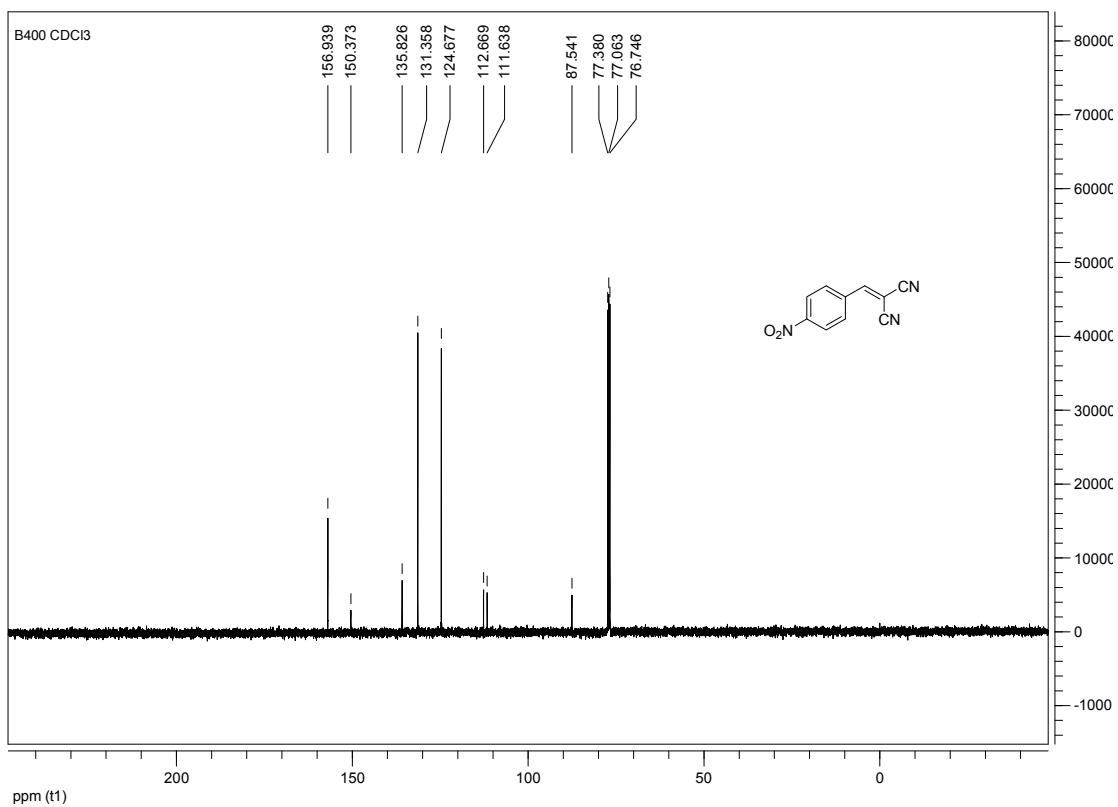

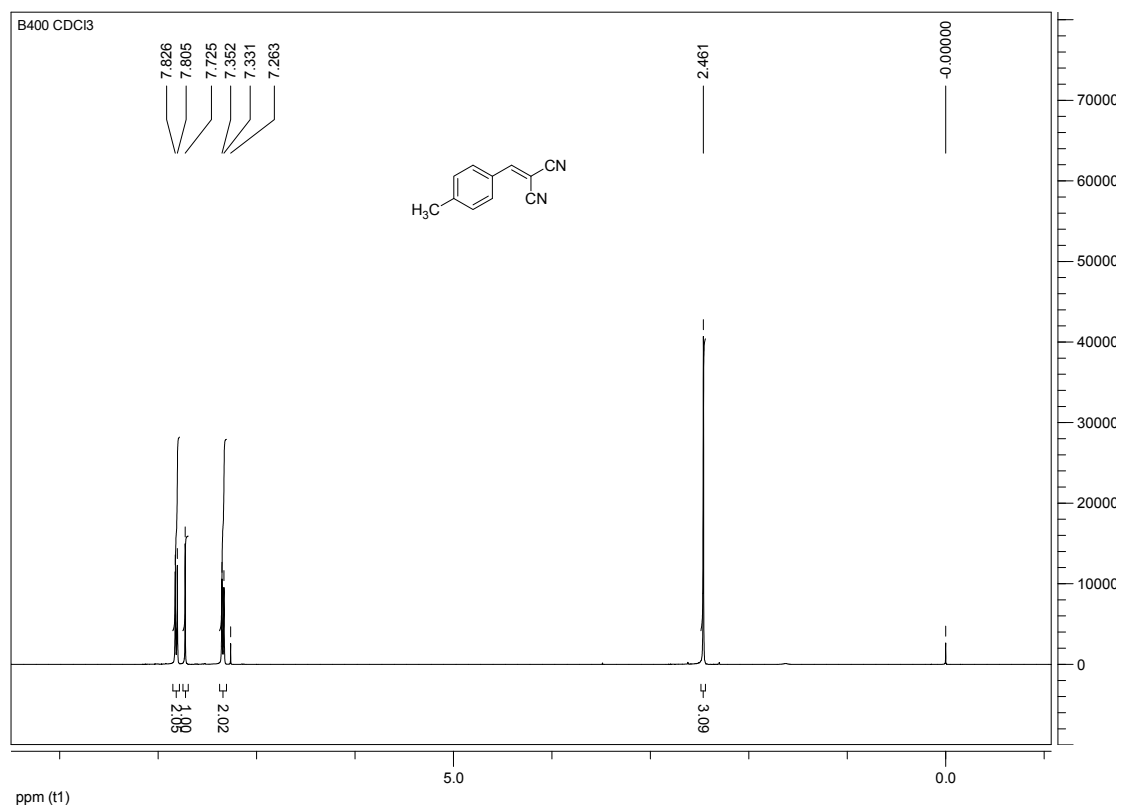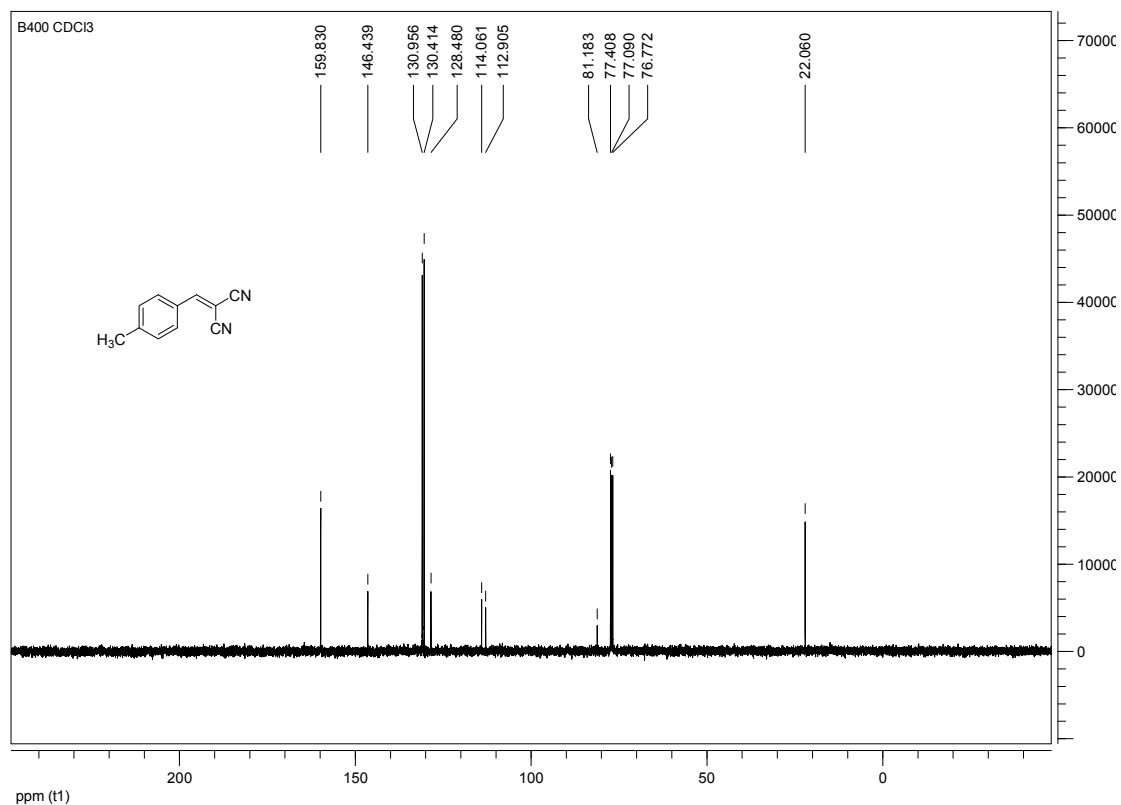

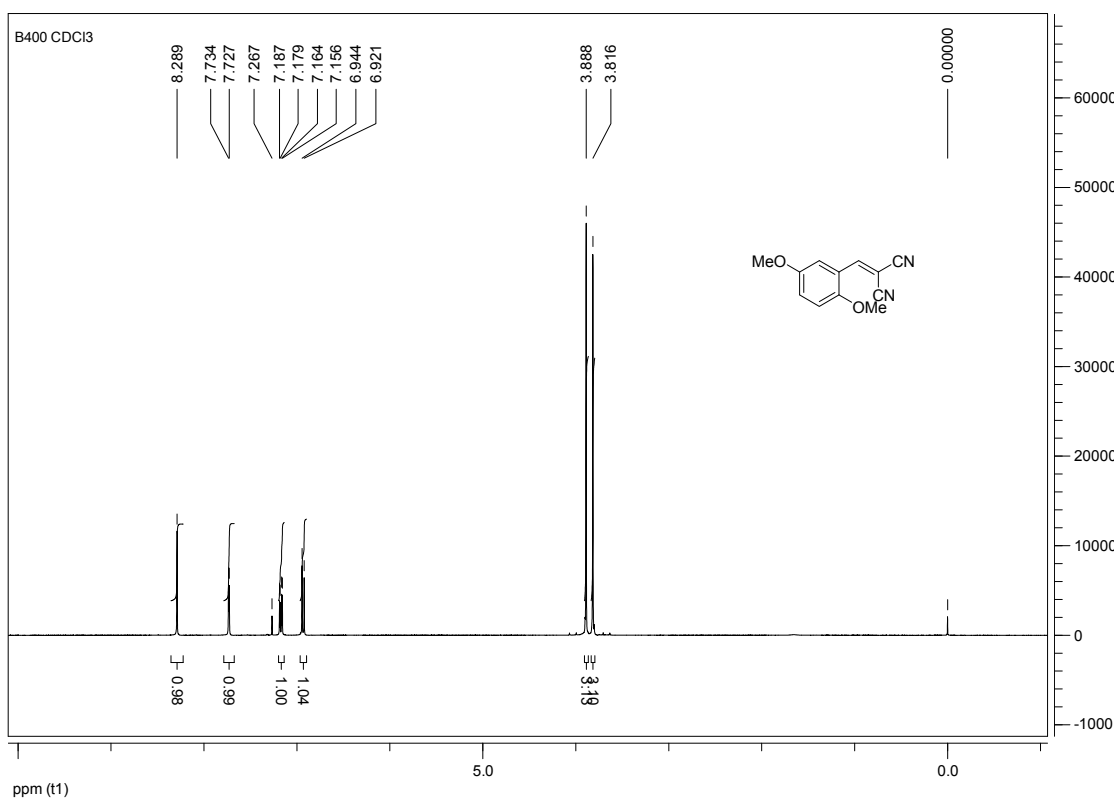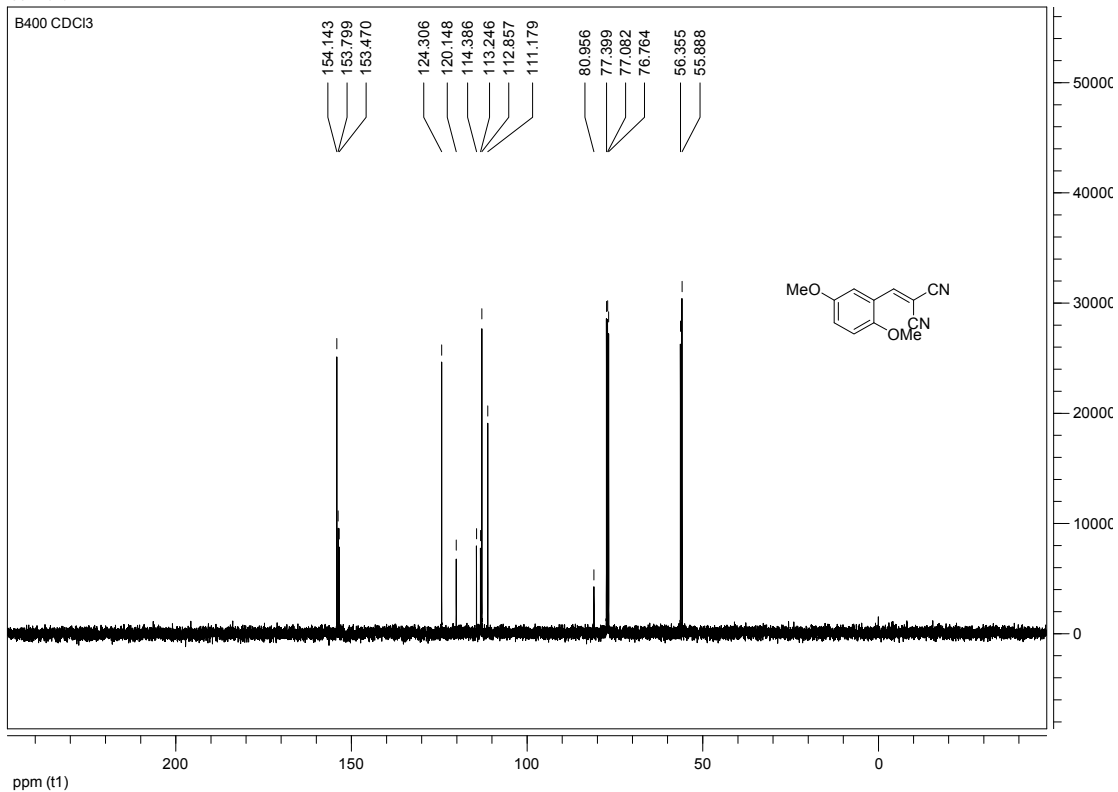

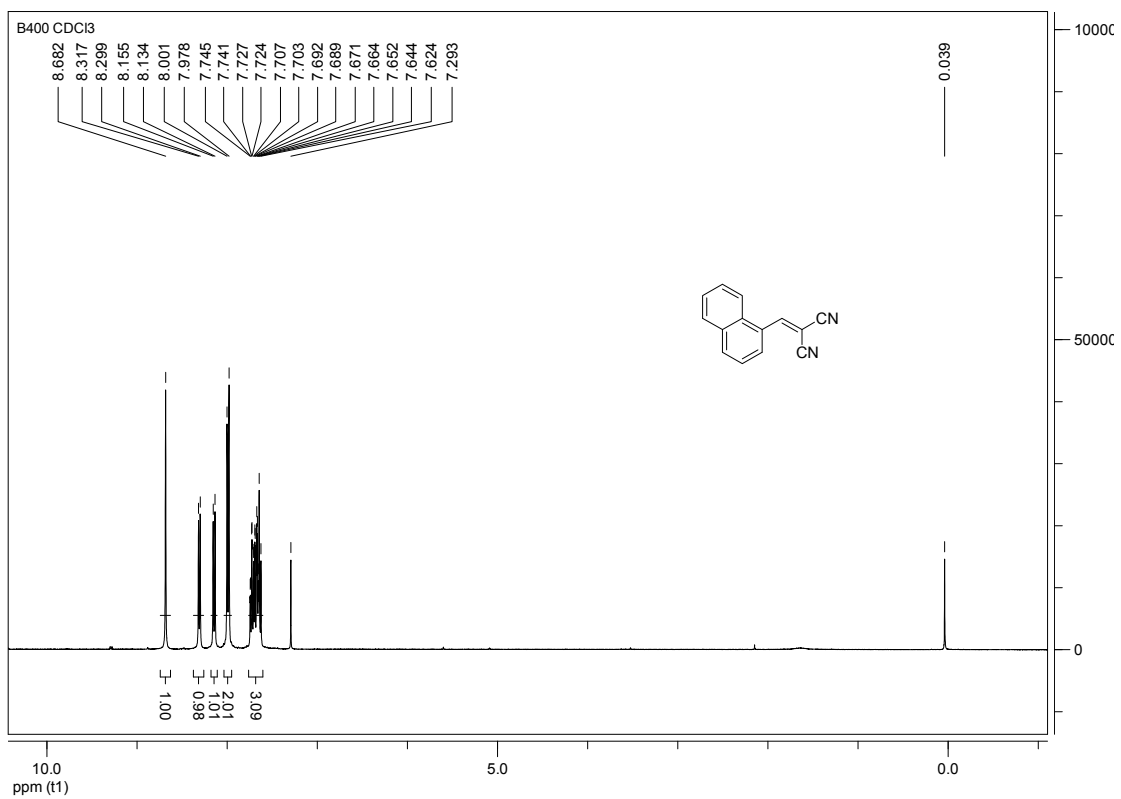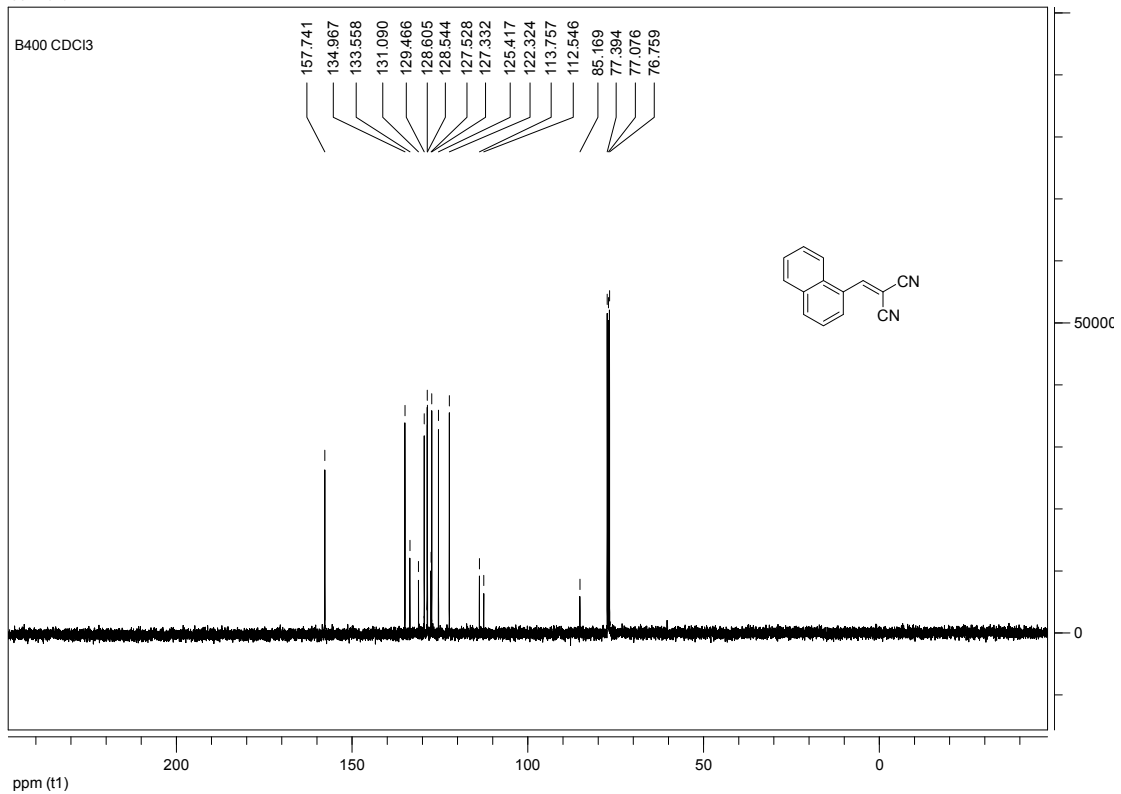

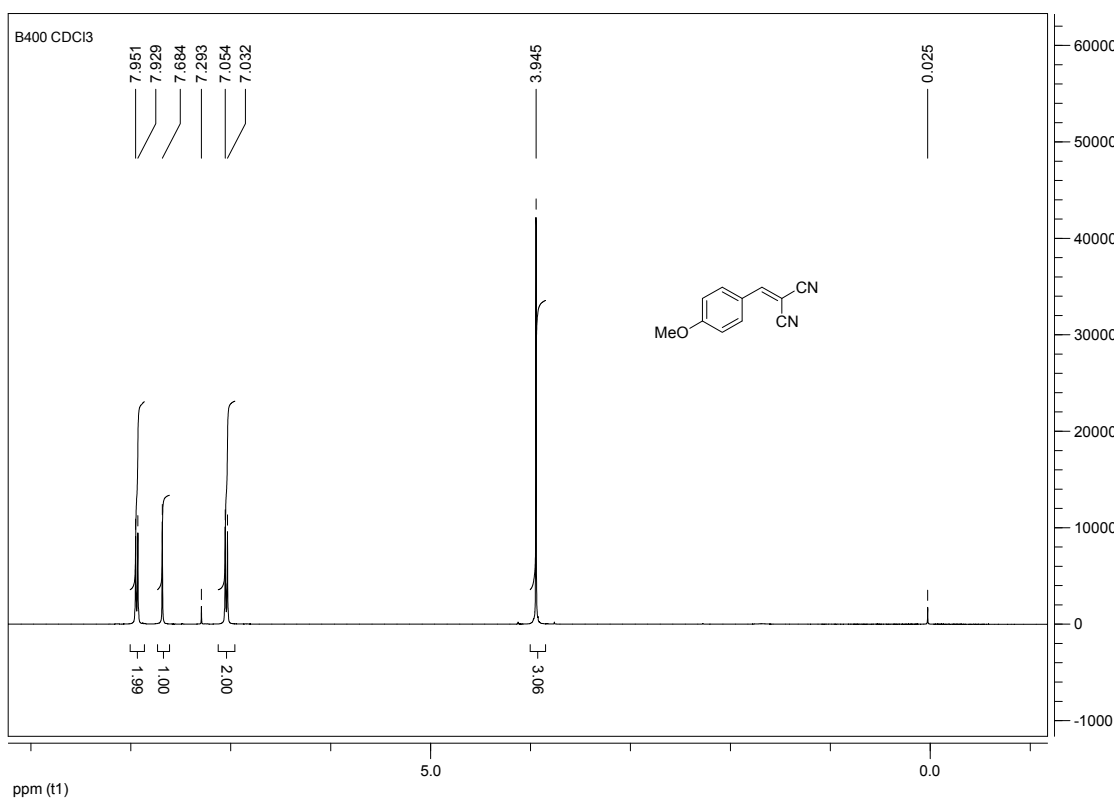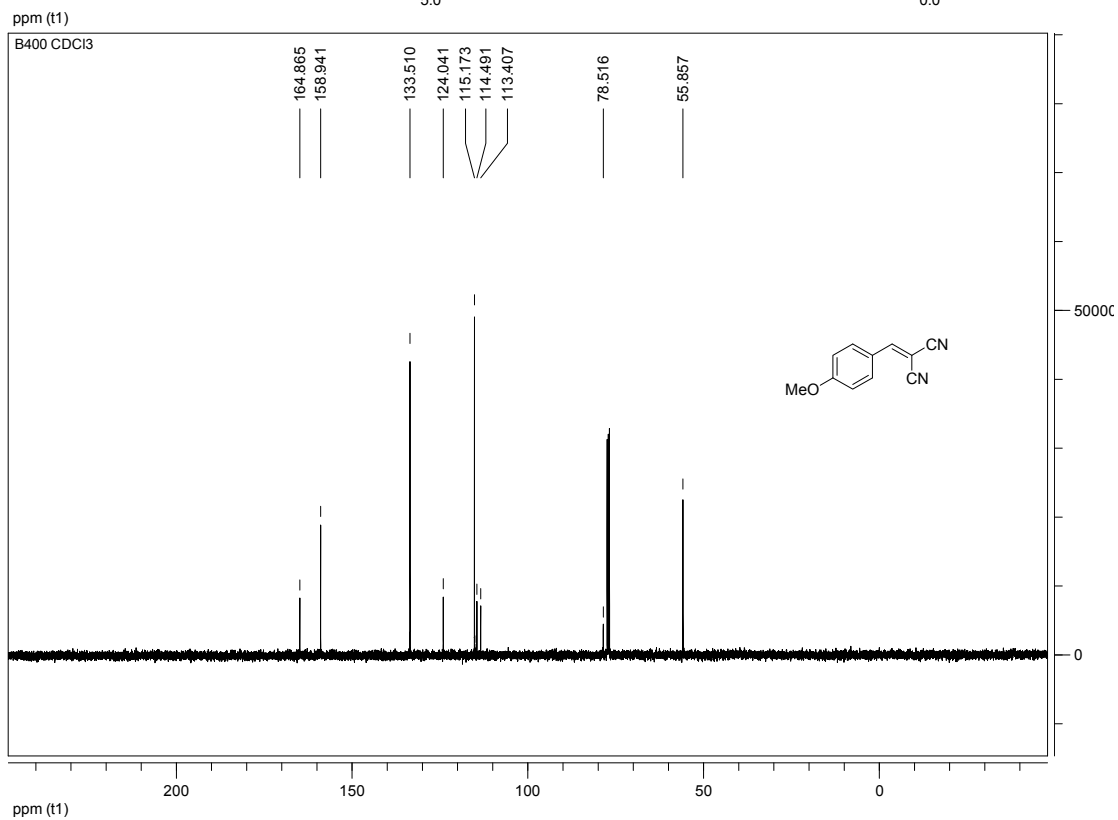

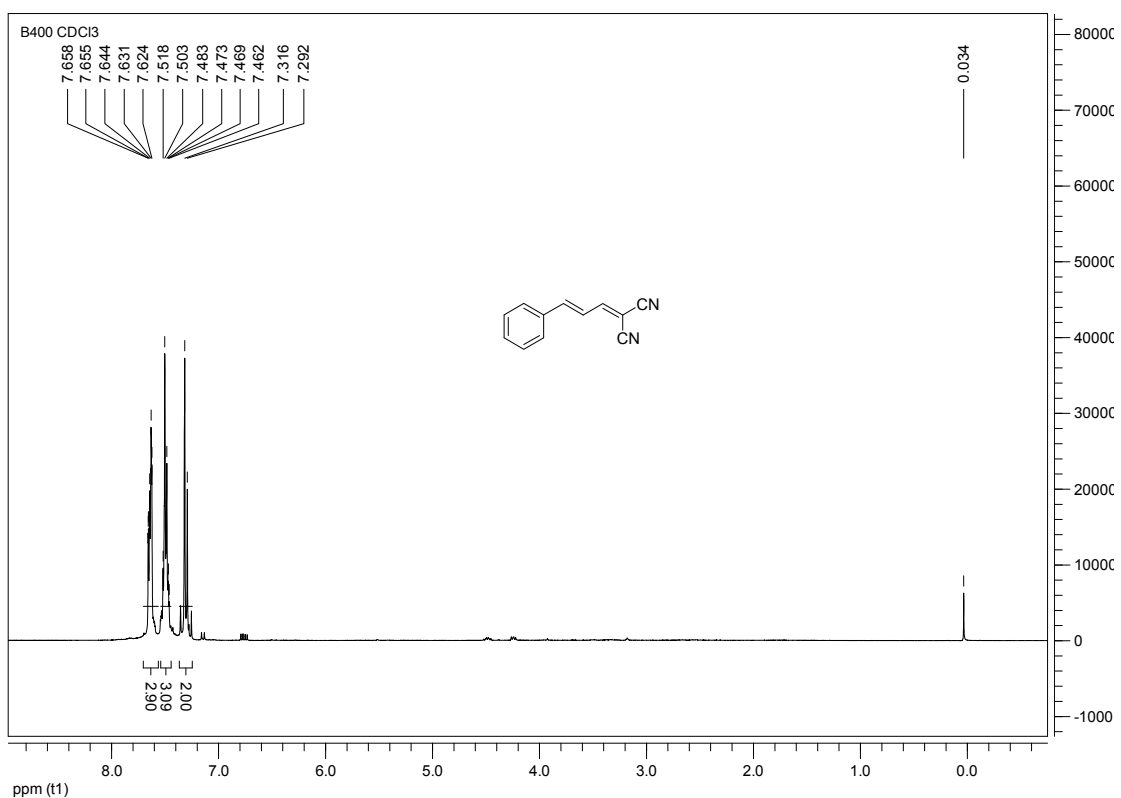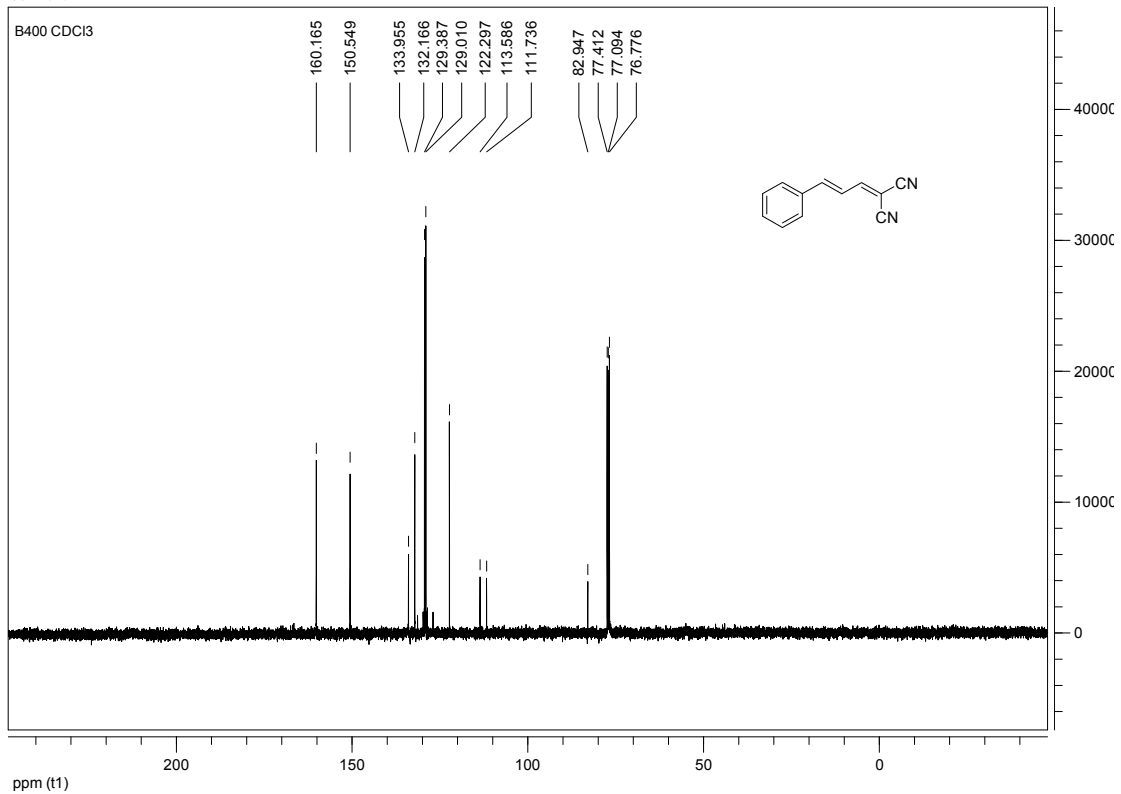



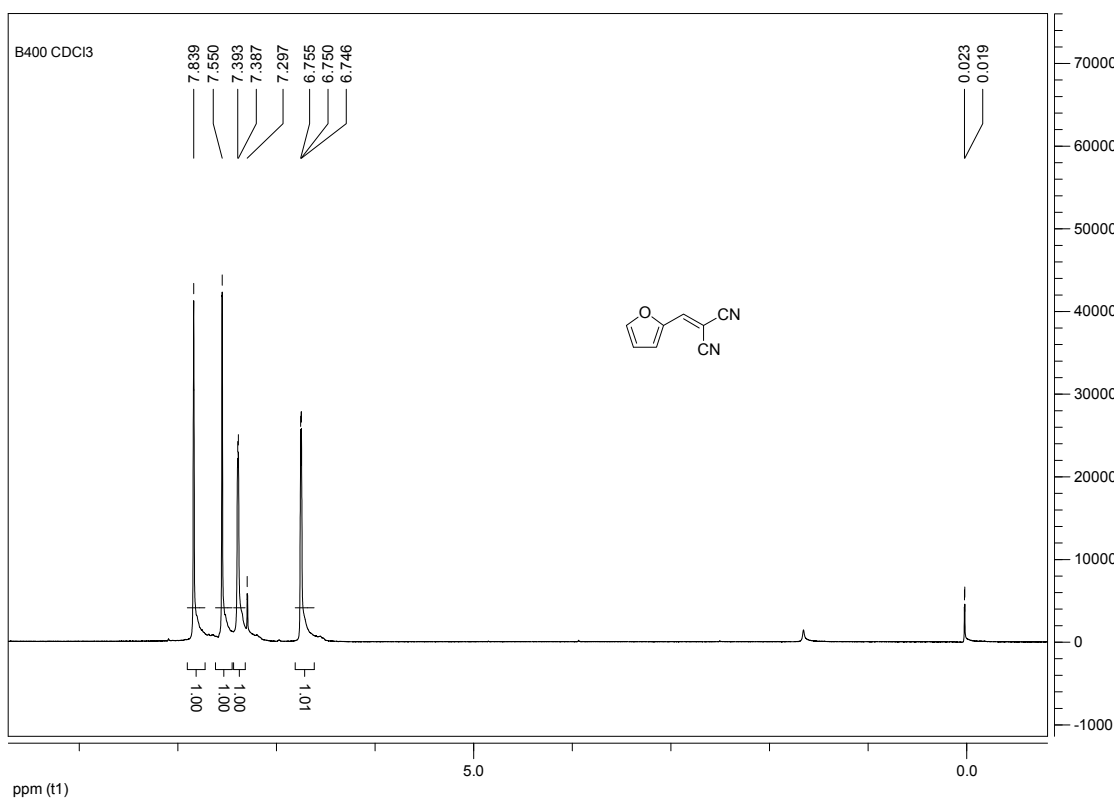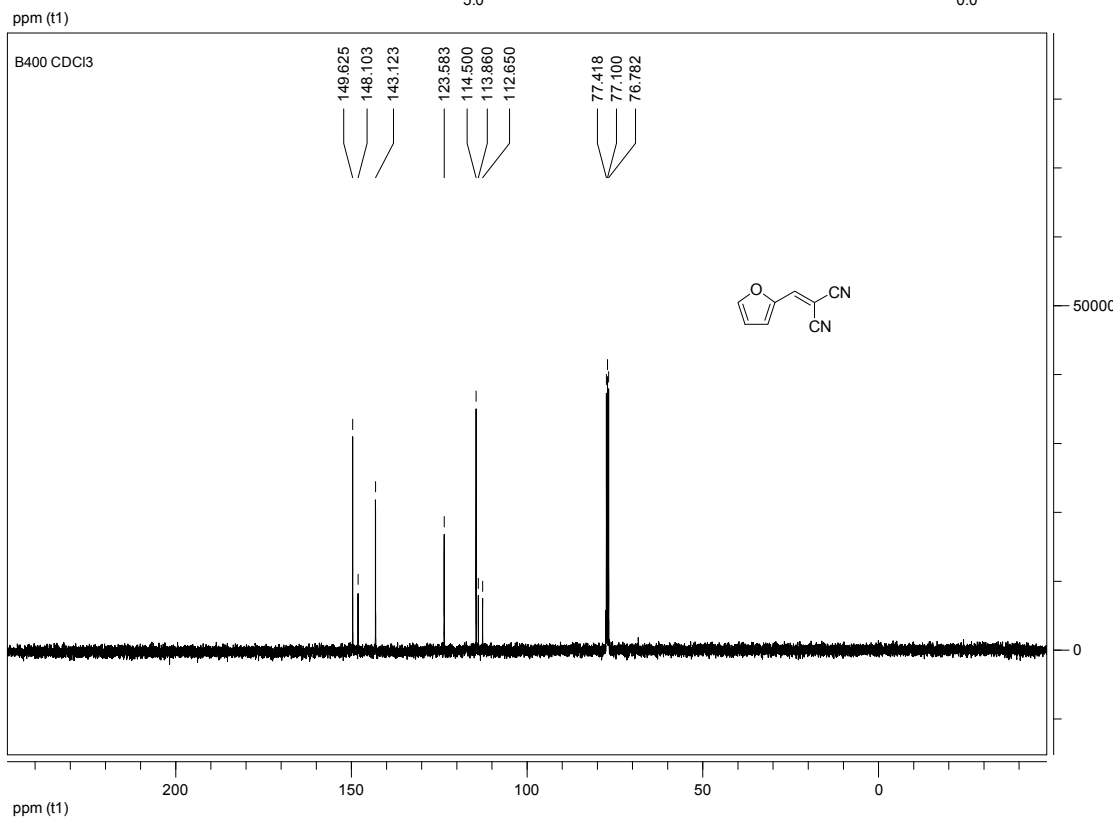

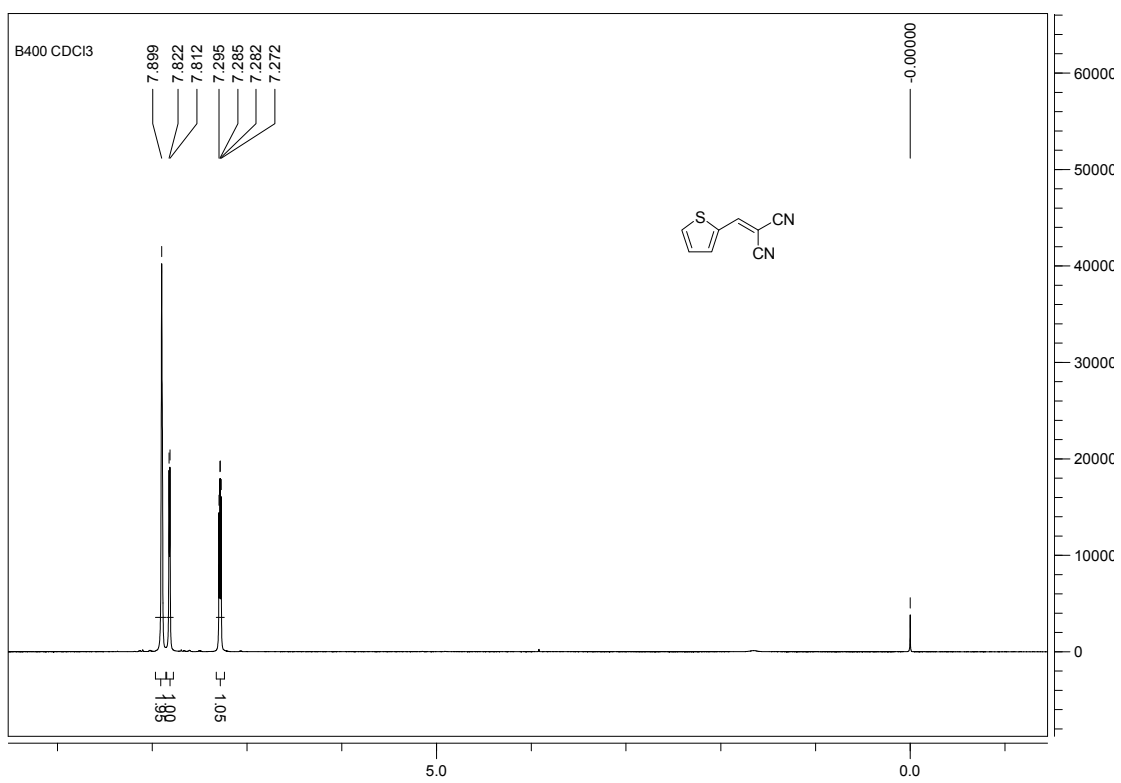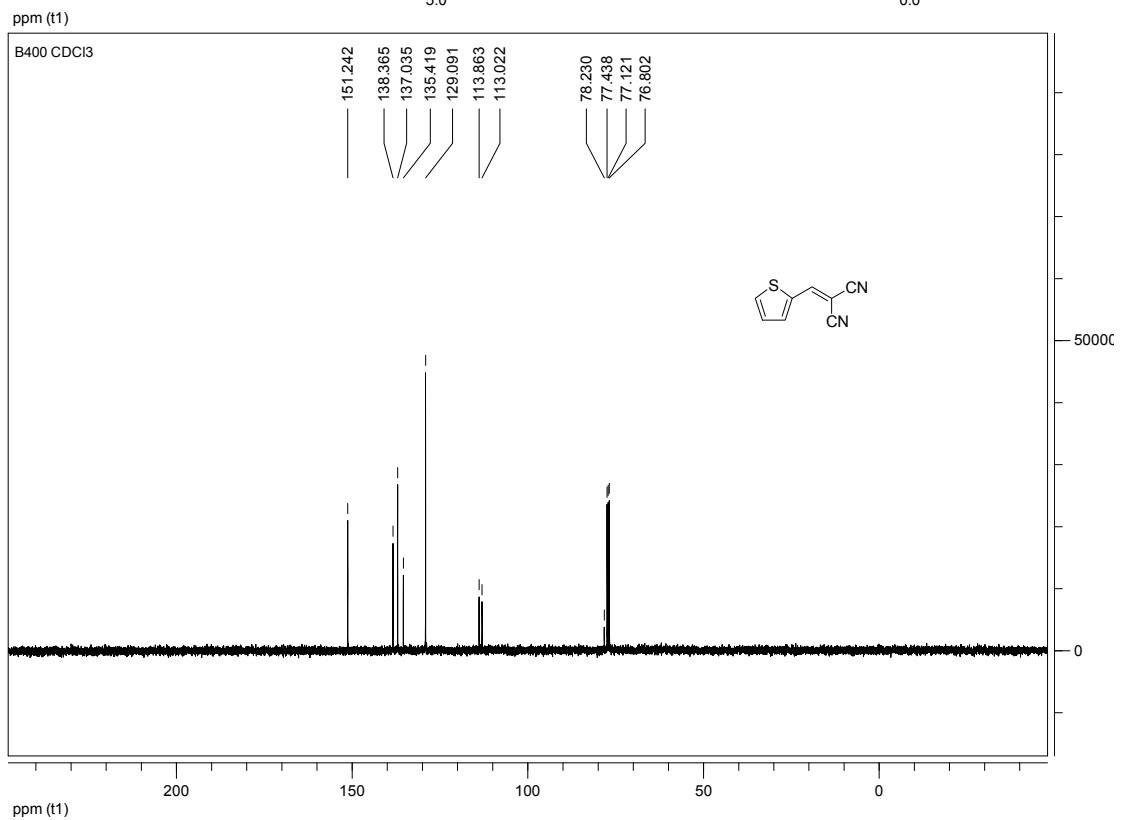

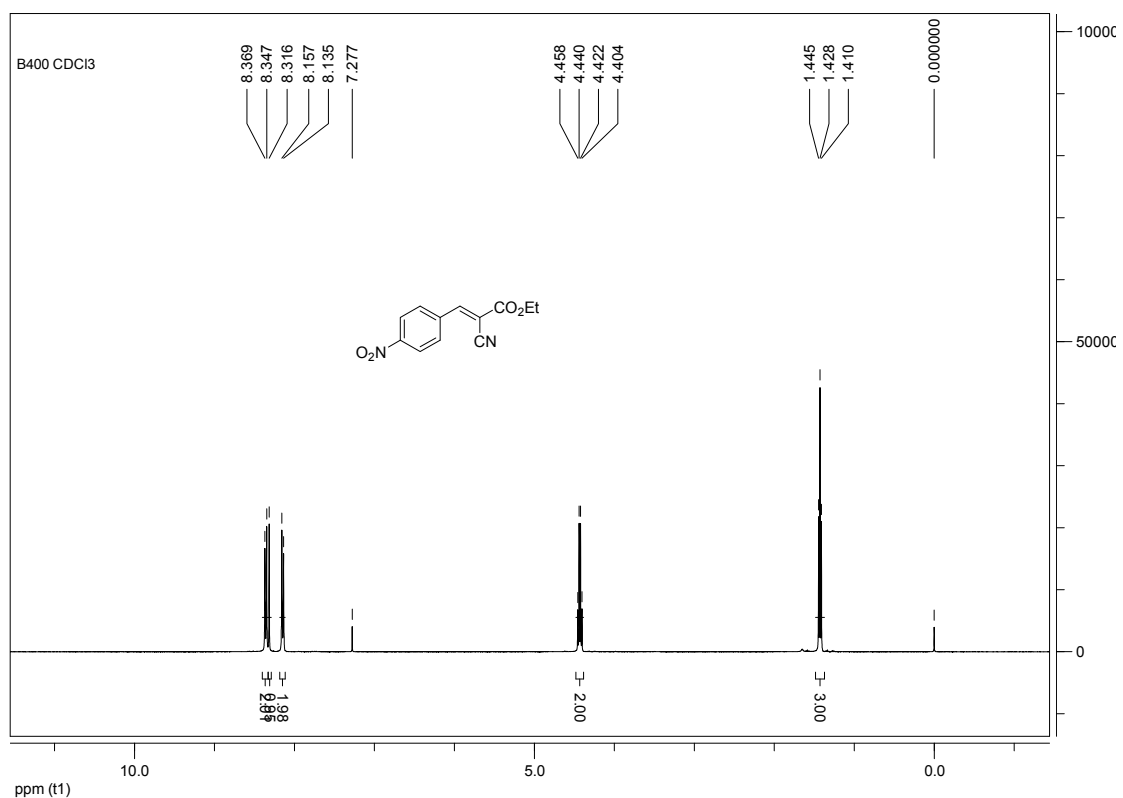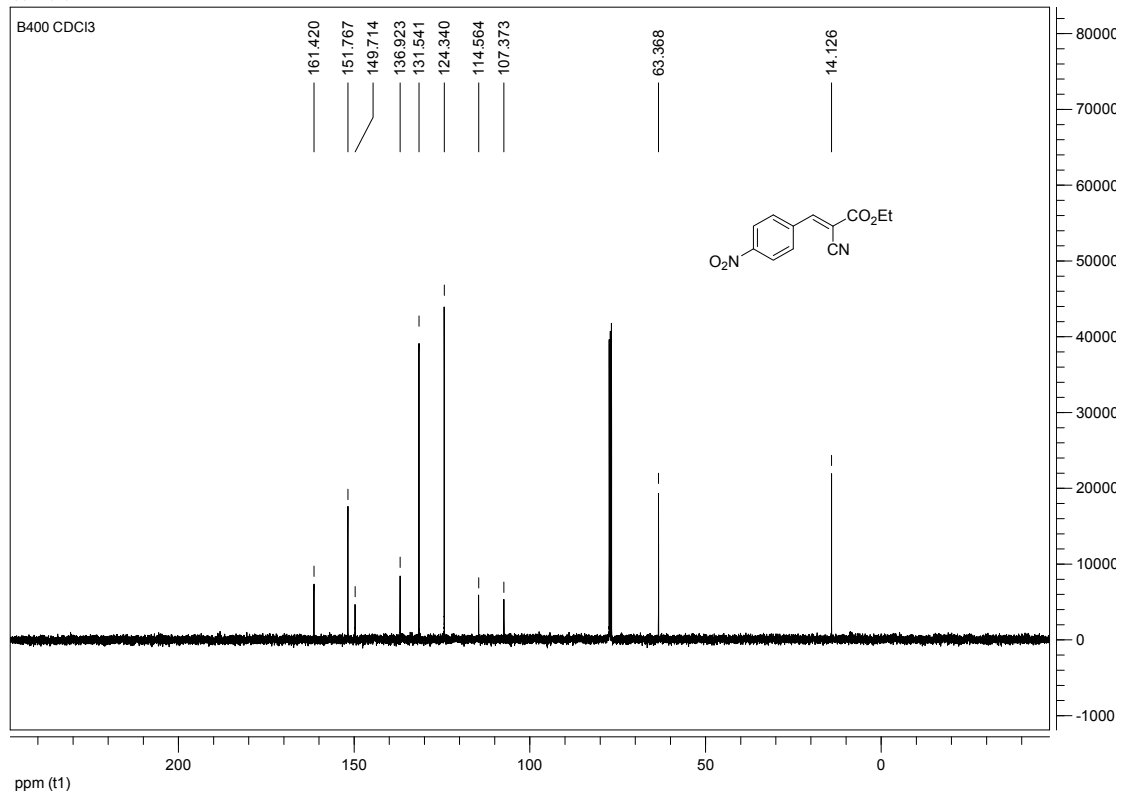

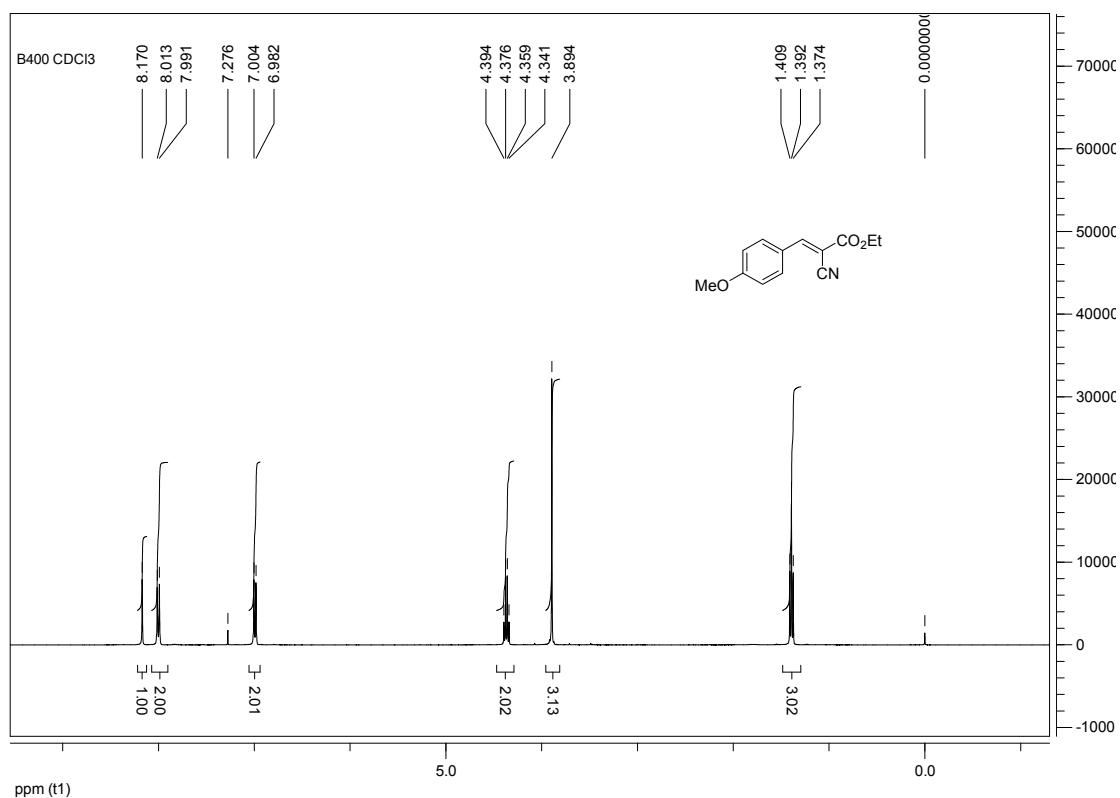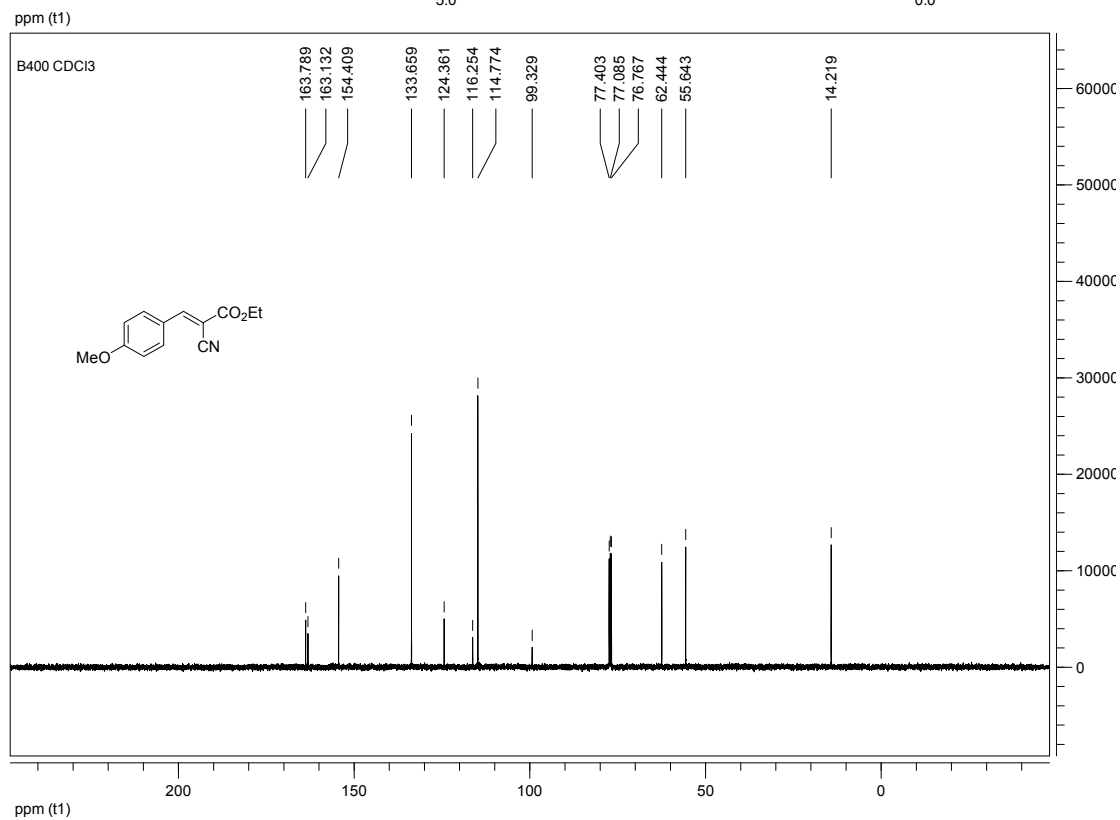

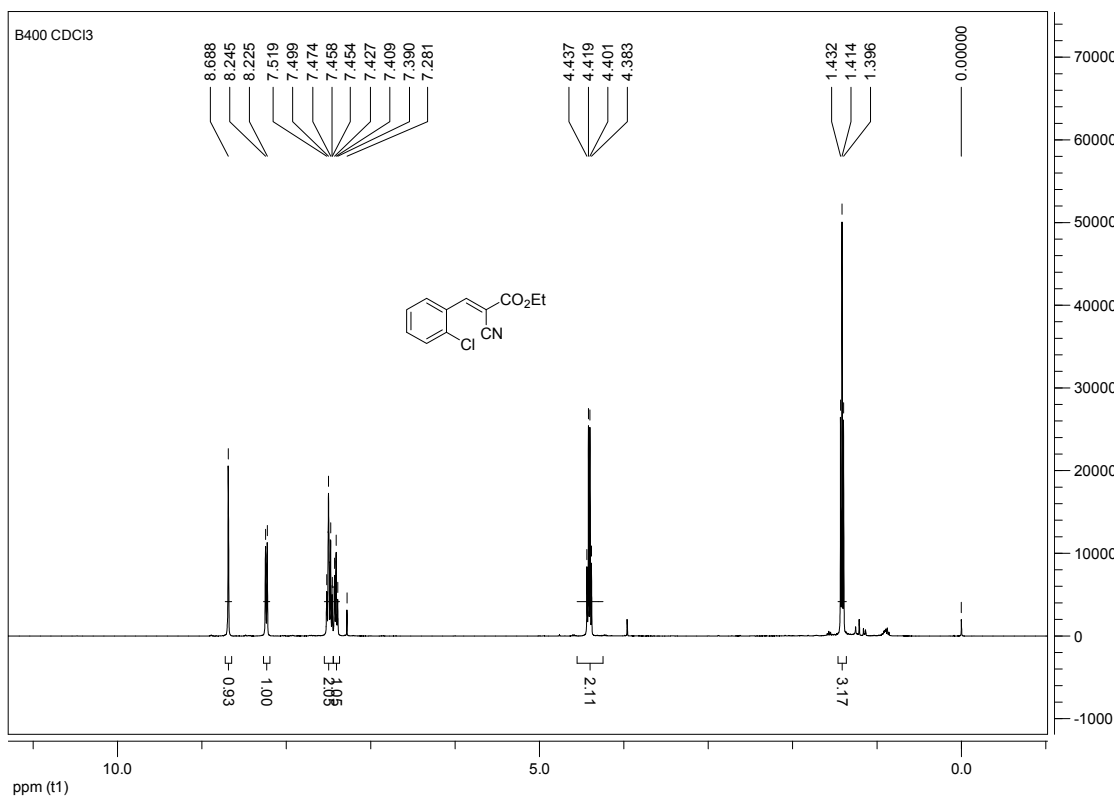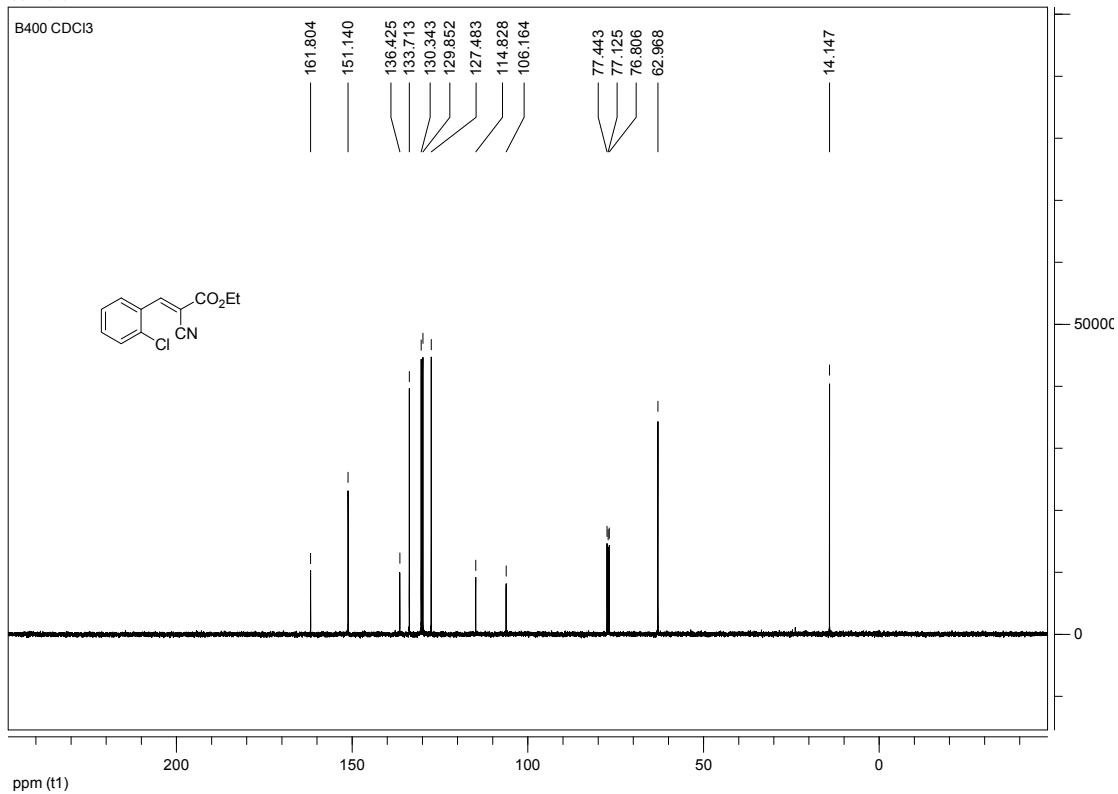

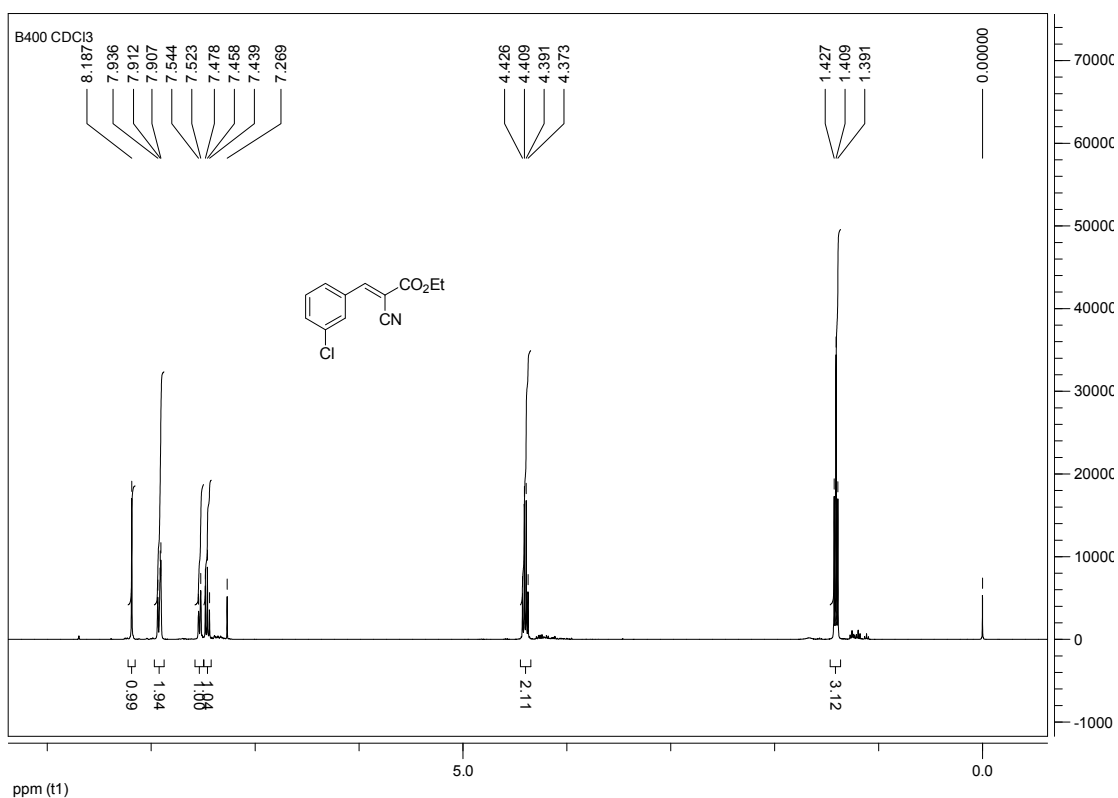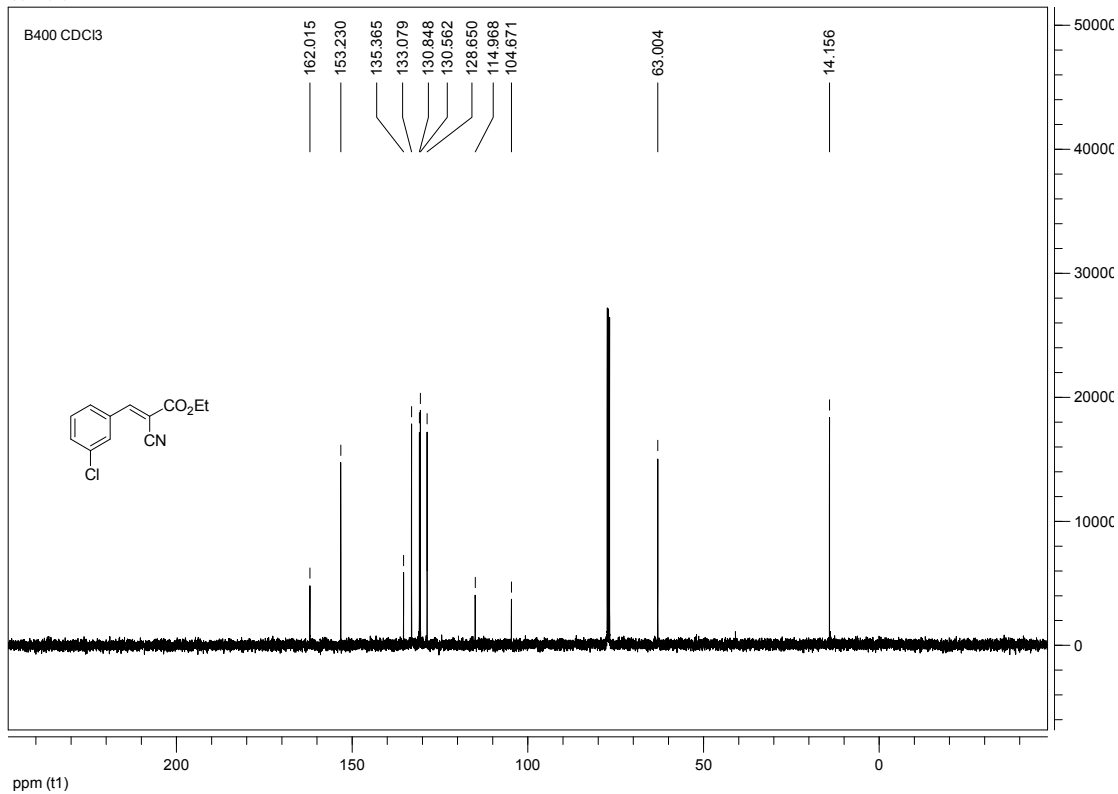

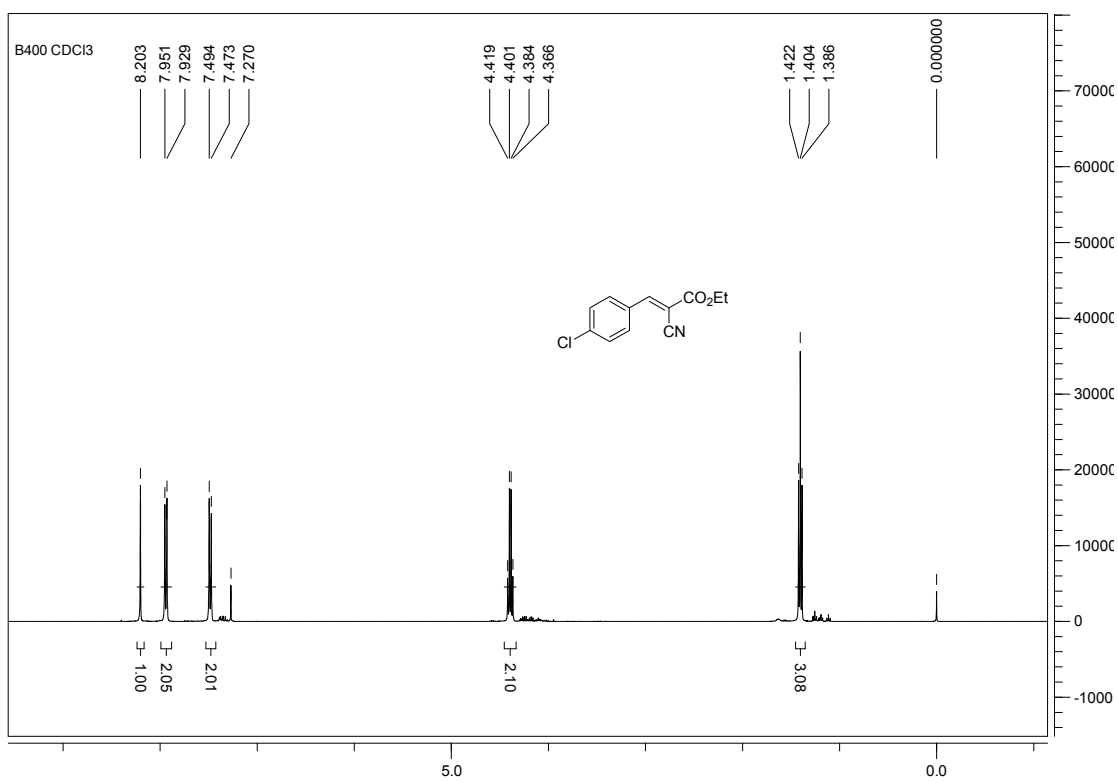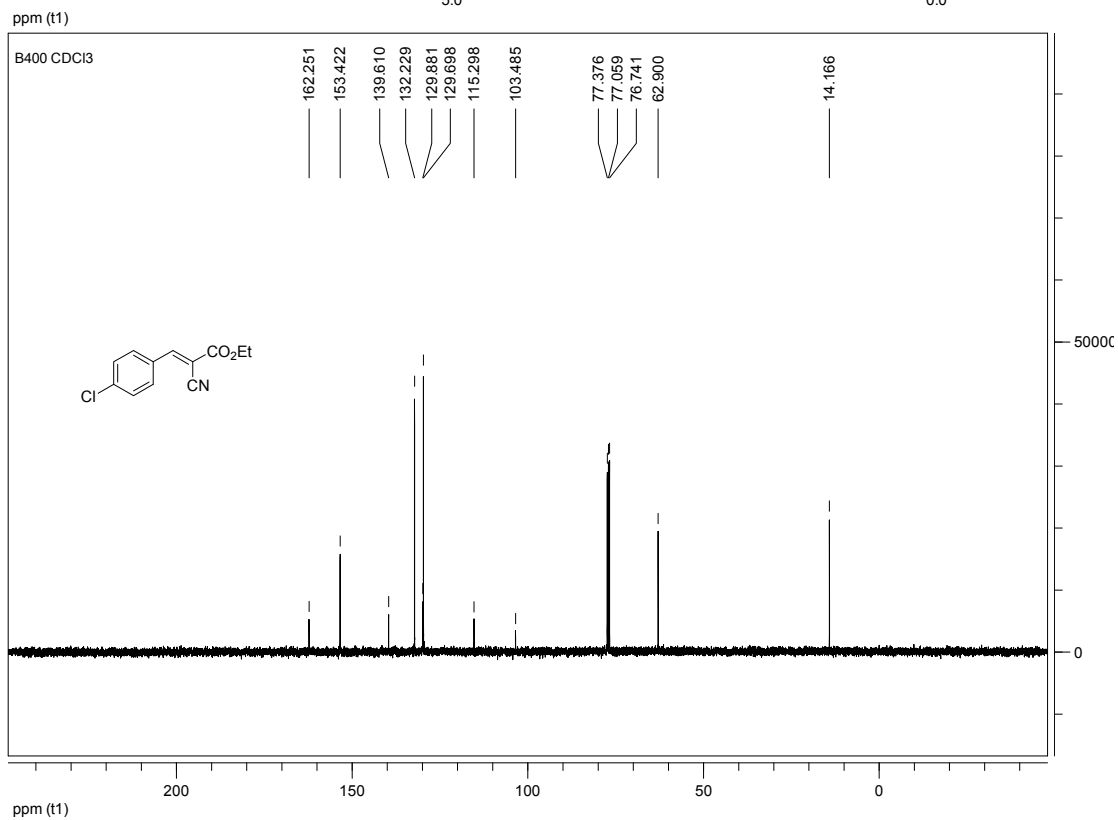

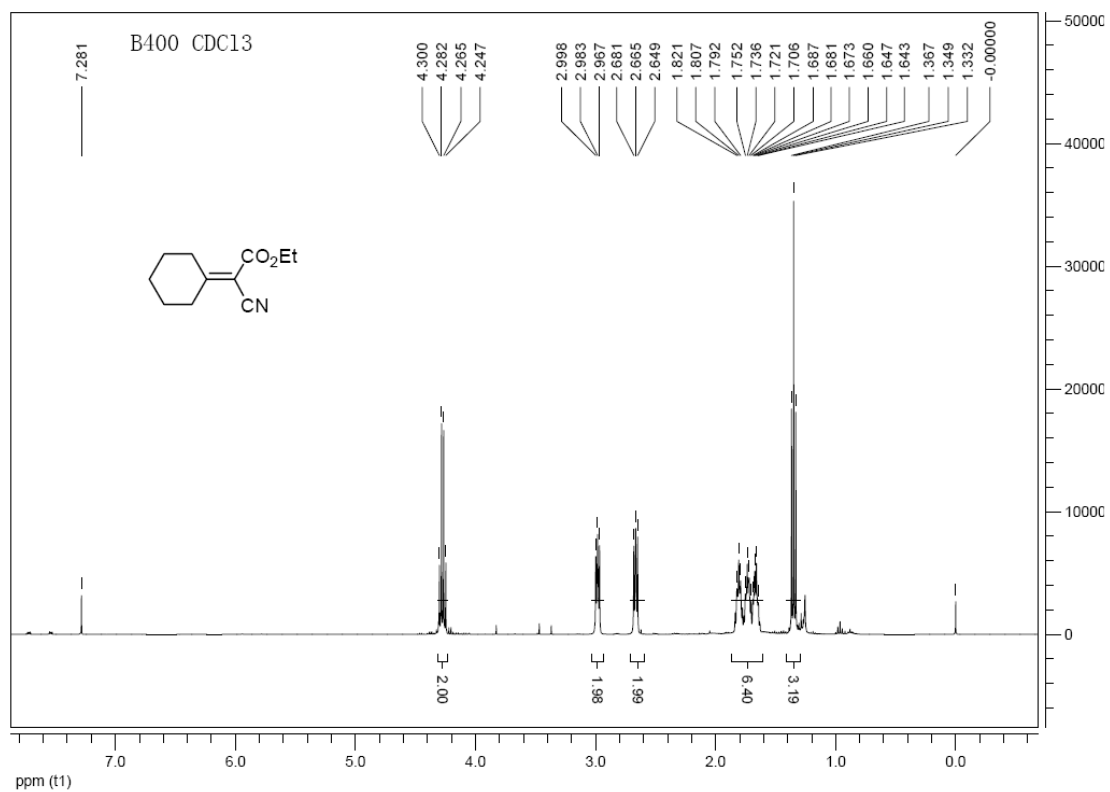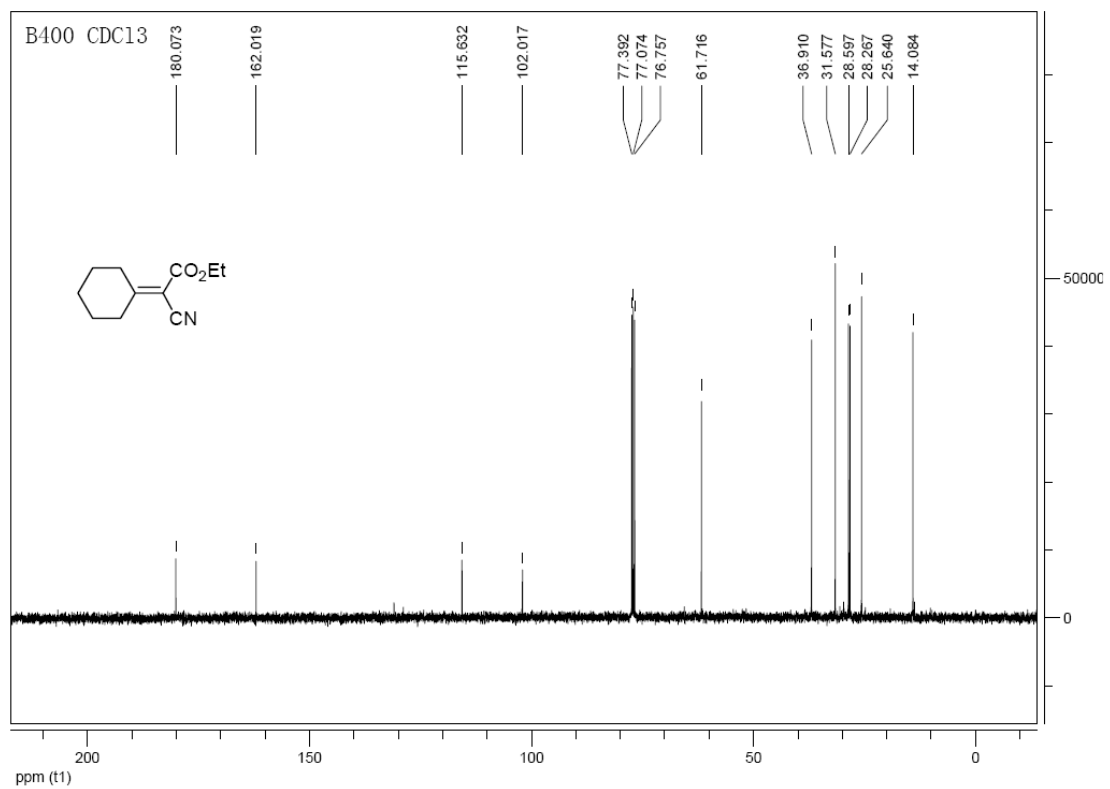



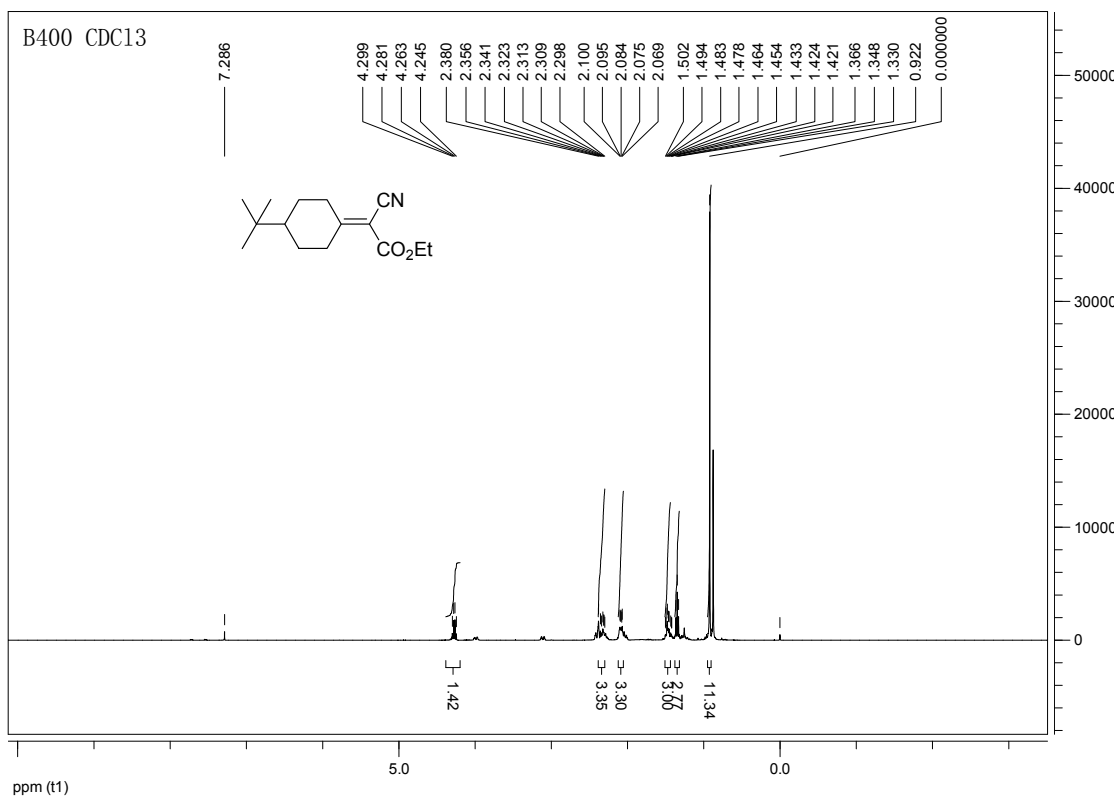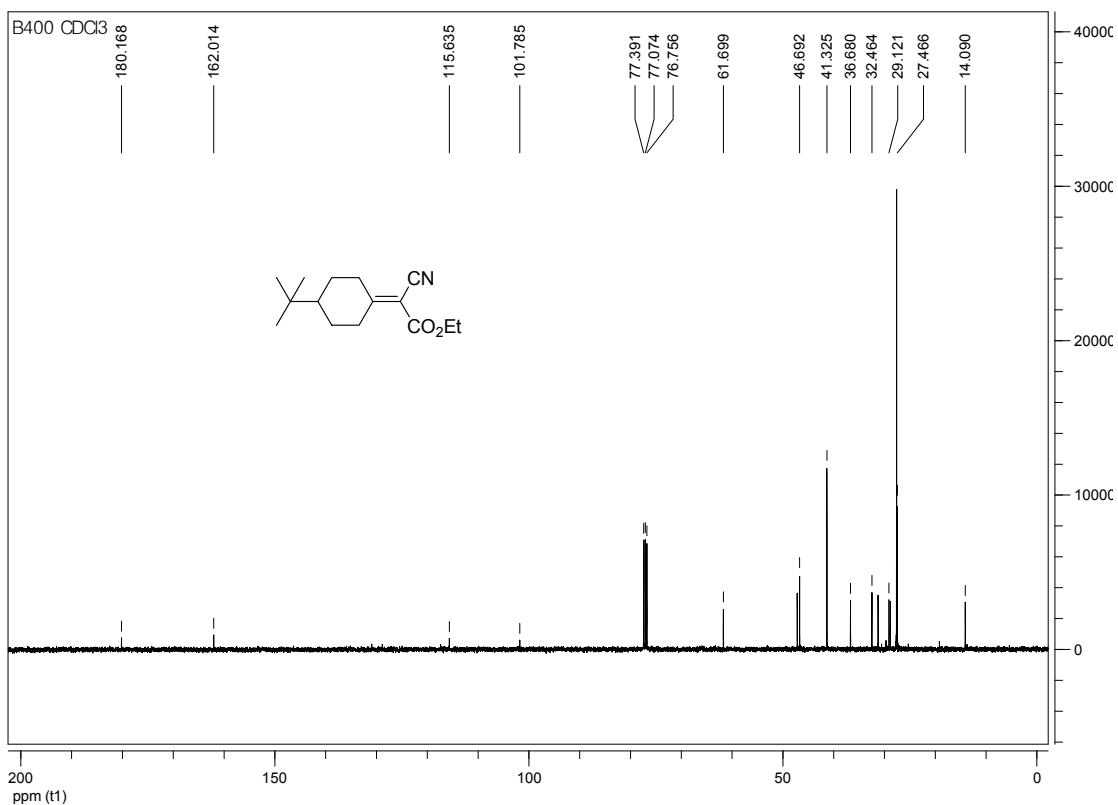

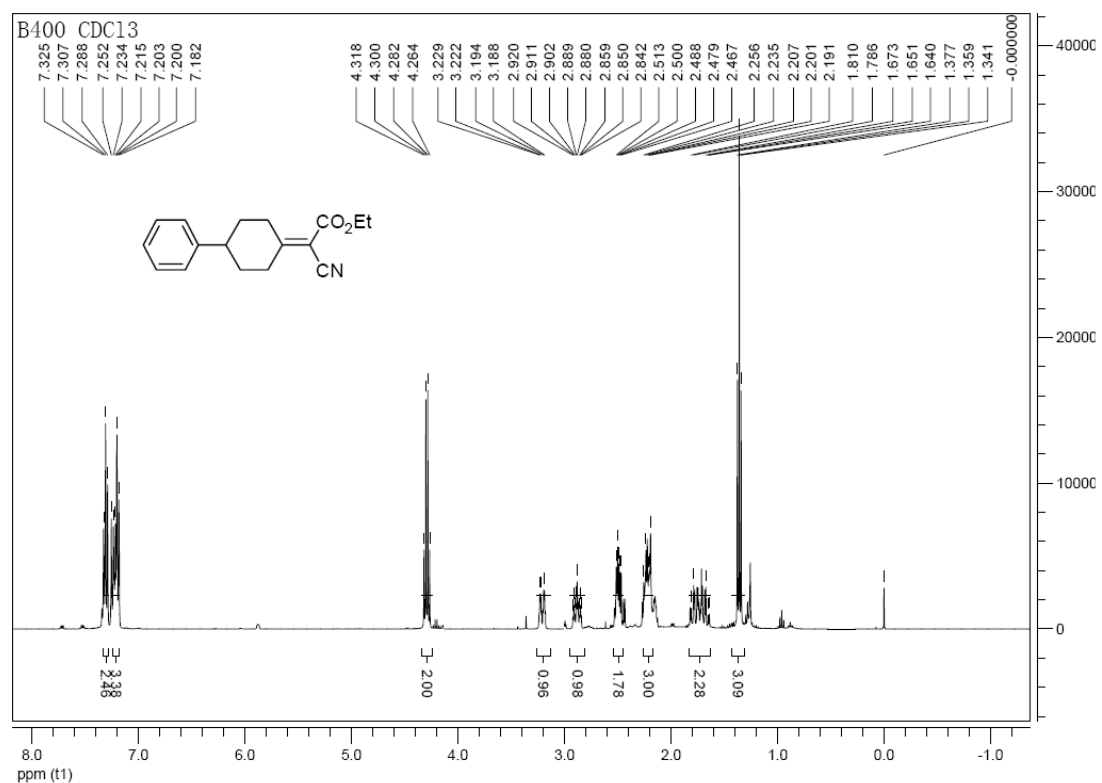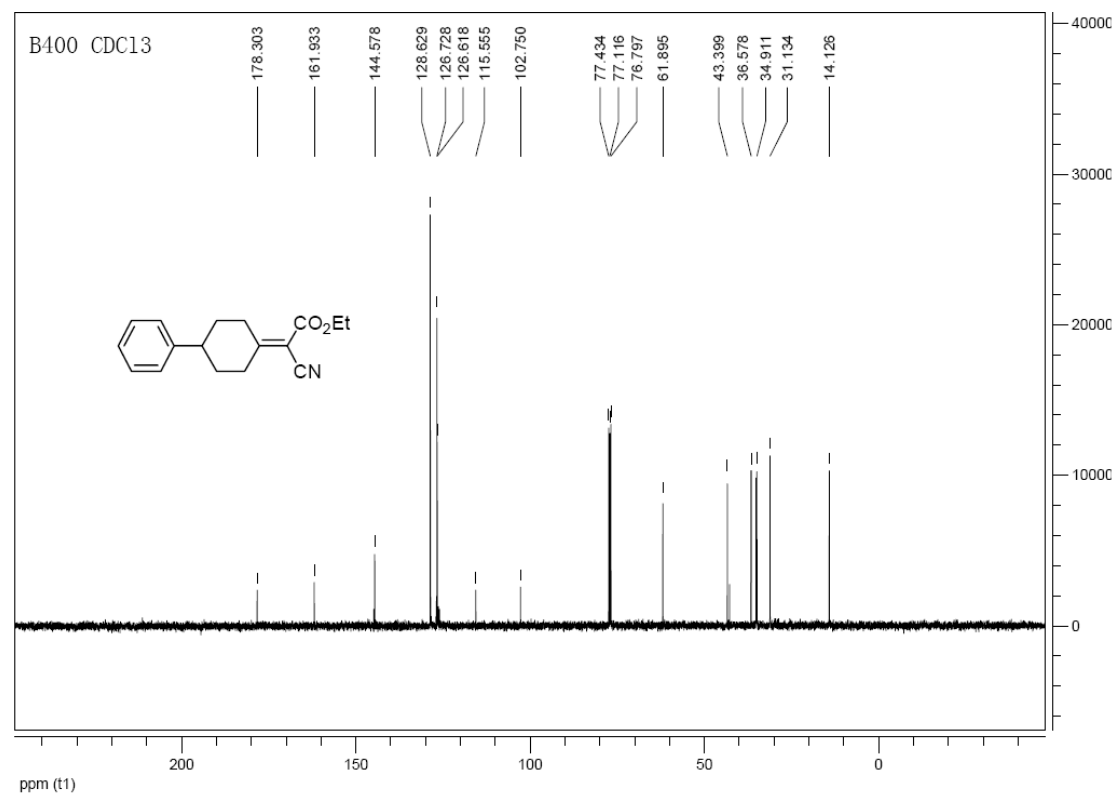

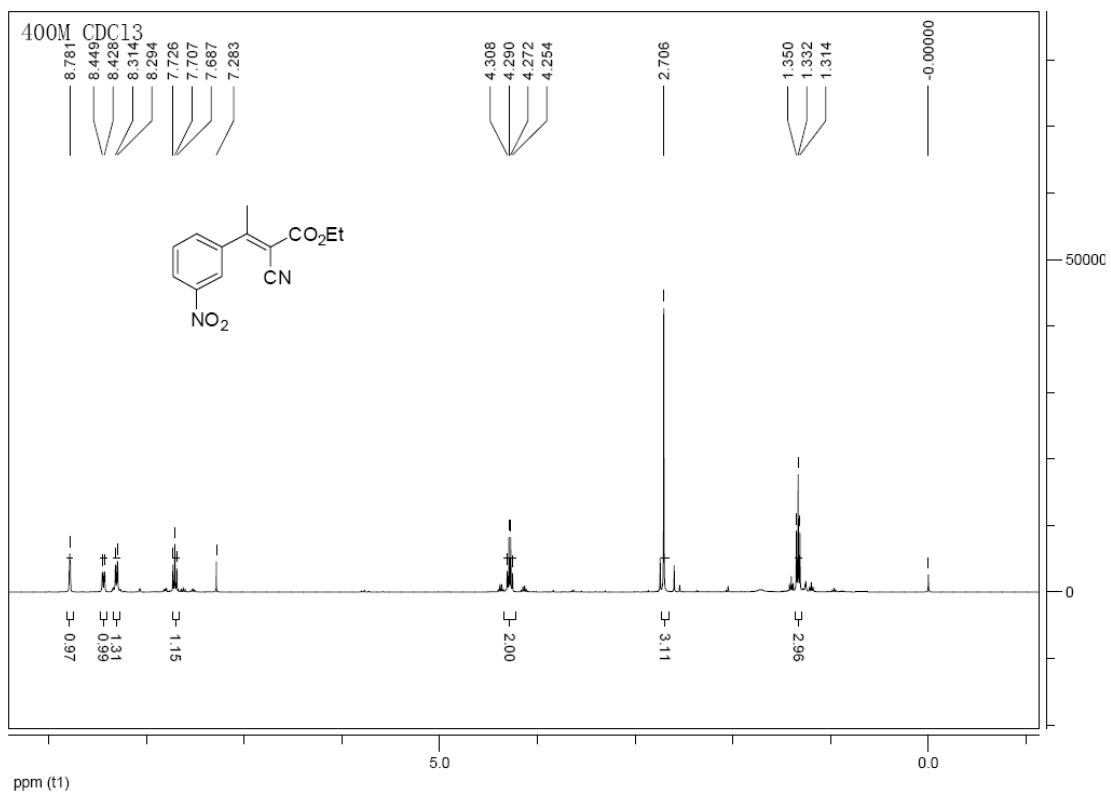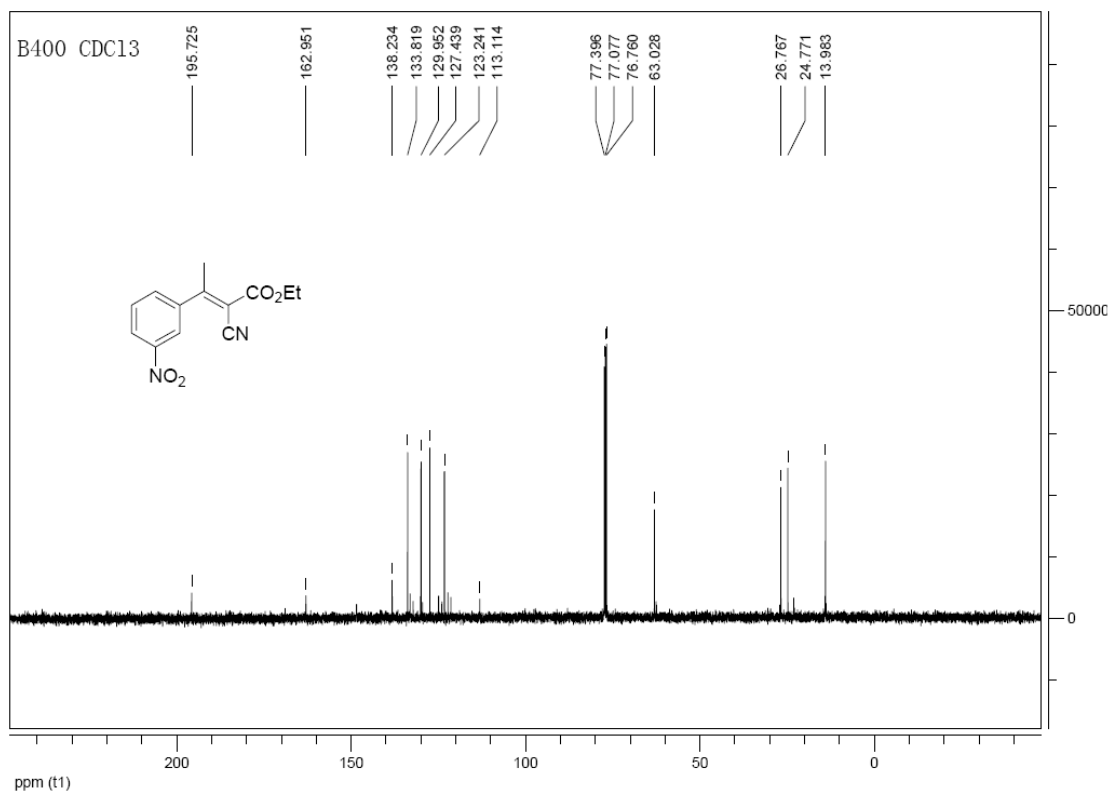

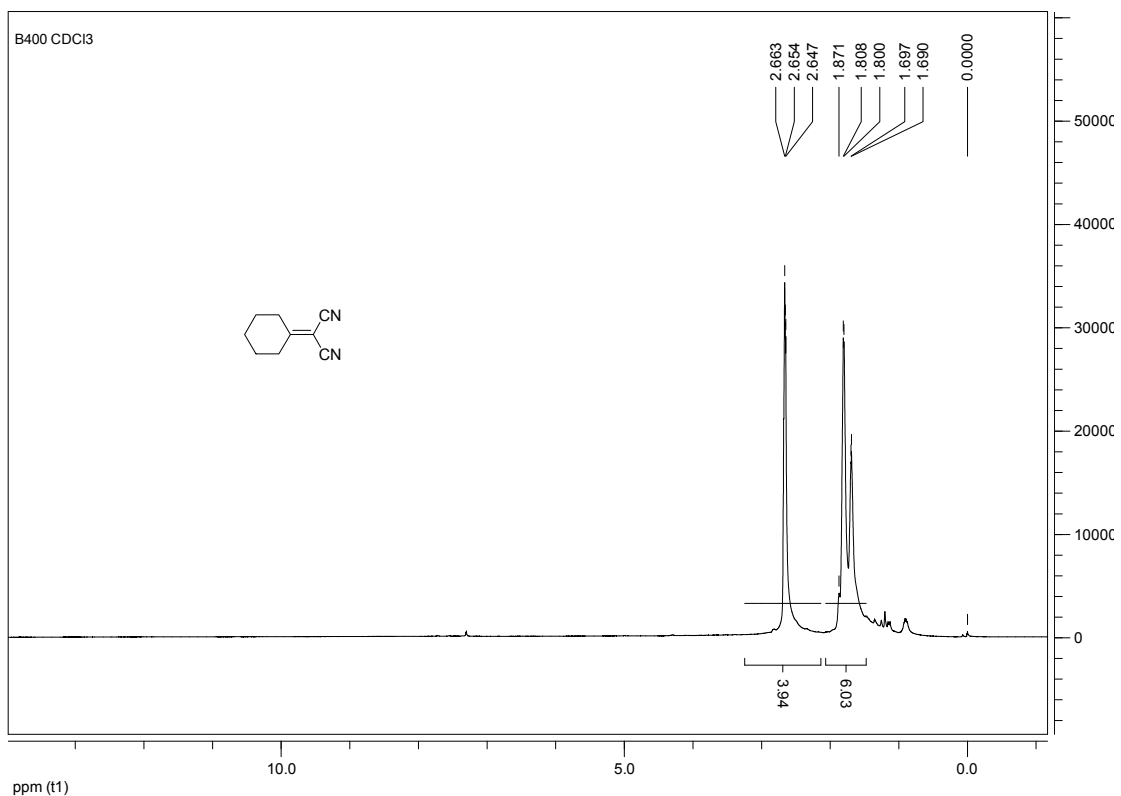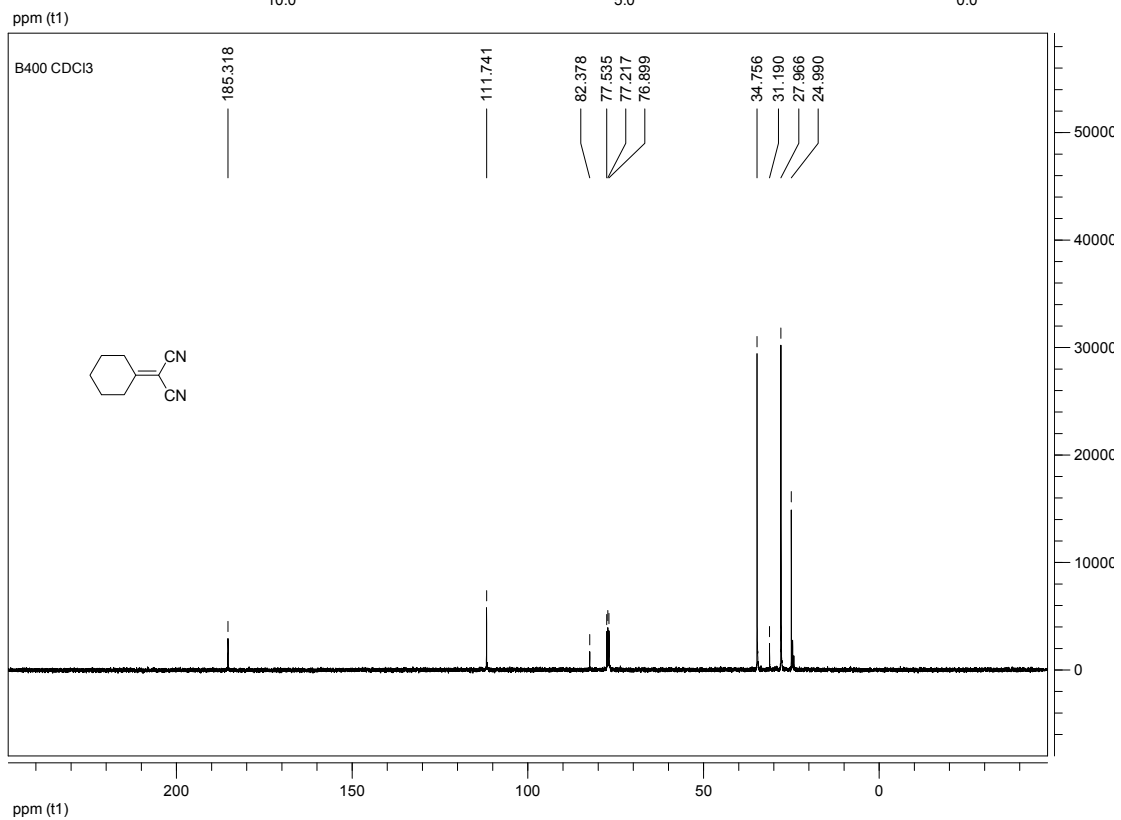

Supplement: c3ra43921f.pdf [file c3ra43921f.pdf]
